# Supplementary material for: Primary immunodeficiency-related genes and varicella-zoster virus reactivation syndrome: a Mendelian randomization study
Source: Front Immunol. 2024 Aug 26;15:1403429. doi: 10.3389/fimmu.2024.1403429 (PMC11381235; doi:10.3389/fimmu.2024.1403429)
Supplement: Supplementary file 1 [file Table1.xlsx]

## Sheet: Table S1
Table S1:Data sources.
Endpoint name in FINNGEN or GCST in GWAS Catalog	Exposure or outcome	Number of cases	Number of controls	Consortium
GCST90085705-GCST90085814	Primary immunodeficiency-related genes	400 unrelated healthy individuals		GWAS Catalog
GCST90018941	Herpes zoster	2731	518343	GWAS Catalog
G6_POSTZOST	Postherpetic neuralgia	313	330377	FINNGEN
GCST90044350	Stroke	6986	448317	GWAS Catalog
GCST90044003	Cerebral aneurysm	290	456058	GWAS Catalog
GCST90044019	Giant cell arteritis	278	456070	GWAS Catalog
H7_KERATITIS	Keratitis	11611	357814	FINNGEN
GCST90043778	Retinopathy	605	455743	GWAS Catalog
GCST90043730	Encephalitis	189	456159	GWAS Catalog
GCST90018843	Cranial nerve palsy	2237	639537	GWAS Catalog
AB1_INTESTINAL_INFECTIONS	Gastrointestinal infections	40881	336396	FINNGEN

## Sheet: Table S2
Table S2: Details of instrumental variables included in genetic instruments.
*The proportion of variance explained by instrumental variables was calculated as R2 = 2 * Beta2 * EAF * (1-EAF) / (2 * Beta2 * EAF * (1-EAF) + SE2 * 2 * Sample size * EAF * (1-EAF))..
**F-statistics were calculated as F = R2 * (Sample size - 1 - k) / ((1-R2) * k), where R2 is the proportion of variance explained in the instrument, k is the number of SNPs included in the instrument.
exposure	id.exposure	SNP	other_allele.exposure	effect_allele.exposure	beta.exposure	se.exposure	pval.exposure	samplesize.exposure	R2*	F-statistic**	Average_R2	Average_F
ACE levels	GCST90085705	rs11221321	A	G	0.215271	0.044765	1.51754e-06	400	0.0546543	23.01	0.660474	75.6715
ACE levels	GCST90085705	rs117211748	A	G	0.216546	0.0466572	3.4639e-06	400	0.0511	21.433	0.660474	75.6715
ACE levels	GCST90085705	rs12731705	C	T	-0.0757156	0.0163563	3.67168e-06	400	0.0508485	21.3219	0.660474	75.6715
ACE levels	GCST90085705	rs16846176	T	C	0.191312	0.0418526	4.85167e-06	400	0.0496441	20.7905	0.660474	75.6715
ACE levels	GCST90085705	rs4353	A	G	0.195862	0.0201157	2.1019e-22	400	0.191599	94.3301	0.660474	75.6715
ACE levels	GCST90085705	rs4414212	A	T	-0.101305	0.0221314	4.70716e-06	400	0.0497749	20.8481	0.660474	75.6715
ACE levels	GCST90085705	rs635634	T	C	-0.0920689	0.0201163	4.72056e-06	400	0.0497626	20.8427	0.660474	75.6715
ACE levels	GCST90085705	rs7281618	C	T	0.107039	0.0234144	4.84253e-06	400	0.0496523	20.7941	0.660474	75.6715
ACE levels	GCST90085705	rs79681549	T	C	0.154262	0.0331482	3.26025e-06	400	0.0513616	21.5487	0.660474	75.6715
ACE levels	GCST90085705	rs9524133	T	G	-0.179978	0.0349792	2.67108e-07	400	0.0620765	26.3416	0.660474	75.6715
AGP 1 levels	GCST90085706	rs117421574	C	T	-0.169376	0.0362916	3.05491e-06	400	0.0516422	21.6728	0.169489	26.9382
AGP 1 levels	GCST90085706	rs6813227	C	T	0.120083	0.0261985	4.57061e-06	400	0.0499022	20.9042	0.169489	26.9382
AGP 1 levels	GCST90085706	rs7873796	C	A	0.119268	0.0220872	6.66807e-08	400	0.0679442	29.013	0.169489	26.9382
Angiogenin levels	GCST90085707	rs11629118	T	C	-0.140411	0.0213514	4.82657e-11	400	0.0975671	43.03	0.263529	35.3355
Angiogenin levels	GCST90085707	rs12191567	G	C	0.0731335	0.0144996	4.56319e-07	400	0.0597973	25.313	0.263529	35.3355
Angiogenin levels	GCST90085707	rs2445859	T	C	0.151955	0.0319092	1.91579e-06	400	0.0536525	22.5643	0.263529	35.3355
Angiogenin levels	GCST90085707	rs72816195	C	T	0.151742	0.0322277	2.49645e-06	400	0.0525126	22.0584	0.263529	35.3355
ANGPTL4 levels	GCST90085708	rs10251677	C	T	-0.143807	0.0310634	3.66593e-06	400	0.0508553	21.3249	0.375718	33.7031
ANGPTL4 levels	GCST90085708	rs12061601	T	C	-0.166496	0.0343654	1.2668e-06	400	0.0554297	23.3556	0.375718	33.7031
ANGPTL4 levels	GCST90085708	rs12476995	A	G	0.0606188	0.0130582	3.44708e-06	400	0.051121	21.4423	0.375718	33.7031
ANGPTL4 levels	GCST90085708	rs4360702	T	C	0.130982	0.0280321	2.9745e-06	400	0.0517573	21.7238	0.375718	33.7031
ANGPTL4 levels	GCST90085708	rs6554535	T	C	-0.123243	0.025555	1.41655e-06	400	0.0549501	23.1418	0.375718	33.7031
ANGPTL4 levels	GCST90085708	rs72768238	G	C	-0.192992	0.0386985	6.13067e-07	400	0.0585371	24.7464	0.375718	33.7031
ANGPTL4 levels	GCST90085708	rs72906020	G	A	0.0862029	0.0182069	2.19449e-06	400	0.0530679	22.3047	0.375718	33.7031
Apo C_I levels	GCST90085709	rs3826688	T	C	-0.0646091	0.0120568	8.38099e-08	400	0.0669813	28.5724	0.130423	29.772
Apo C_I levels	GCST90085709	rs4733269	T	C	0.0642863	0.01235	1.93621e-07	400	0.0634419	26.9603	0.130423	29.772
Apo E levels	GCST90085710	rs429358	T	C	0.225411	0.0411455	4.29235e-08	400	0.0697948	29.8626	0.18148	29.2667
Apo E levels	GCST90085710	rs7567690	T	C	0.240305	0.0493327	1.10977e-06	400	0.0559974	23.609	0.18148	29.2667
Apo E levels	GCST90085710	rs7934831	C	T	0.188172	0.0387437	1.1928e-06	400	0.055688	23.4708	0.18148	29.2667
Apo H levels	GCST90085711	rs12141732	T	C	0.0649518	0.0137868	2.46315e-06	400	0.0525705	22.084	0.270303	29.19
Apo H levels	GCST90085711	rs1385854	C	T	-0.0973788	0.0210047	3.55128e-06	400	0.0509925	21.3855	0.270303	29.19
Apo H levels	GCST90085711	rs17558904	C	G	0.0707043	0.0151501	3.05737e-06	400	0.0516388	21.6713	0.270303	29.19
Apo H levels	GCST90085711	rs3852011	C	T	-0.0952696	0.020378	2.93781e-06	400	0.0518108	21.7475	0.270303	29.19
Apo H levels	GCST90085711	rs7975389	T	C	0.0939064	0.0180634	2.00674e-07	400	0.0632902	26.8915	0.270303	29.19
CA 15 3 levels	GCST90085712	rs11601647	C	T	0.208489	0.0439136	2.05737e-06	400	0.0533456	22.428	0.478923	90.7614
CA 15 3 levels	GCST90085712	rs17051819	G	A	-0.252309	0.0535012	2.4059e-06	400	0.0526718	22.129	0.478923	90.7614
CA 15 3 levels	GCST90085712	rs2070803	G	A	-0.400854	0.0298463	4.00276e-41	400	0.310797	179.479	0.478923	90.7614
CA 15 3 levels	GCST90085712	rs482377	G	C	0.510666	0.0992216	2.65077e-07	400	0.0621089	26.3563	0.478923	90.7614
Cathepsin D levels	GCST90085713	rs12711982	A	G	0.0857898	0.0185279	3.65153e-06	400	0.0508723	21.3324	0.25977	27.6534
Cathepsin D levels	GCST90085713	rs144047813	G	A	0.13457	0.0287289	2.81128e-06	400	0.0520007	21.8315	0.25977	27.6534
Cathepsin D levels	GCST90085713	rs1595485	T	C	0.0848456	0.0179826	2.37945e-06	400	0.0527194	22.1501	0.25977	27.6534
Cathepsin D levels	GCST90085713	rs6772678	T	C	-0.0706974	0.0150244	2.53241e-06	400	0.052451	22.031	0.25977	27.6534
Cathepsin D levels	GCST90085713	rs9402790	A	T	-0.153804	0.0329267	2.99575e-06	400	0.0517266	21.7102	0.25977	27.6534
CD40 levels	GCST90085714	rs114713026	G	A	0.112771	0.0234177	1.46727e-06	400	0.054799	23.0745	0.442267	44.4065
CD40 levels	GCST90085714	rs1180974	G	A	-0.0599096	0.0128322	3.03107e-06	400	0.051676	21.6878	0.442267	44.4065
CD40 levels	GCST90085714	rs2434081	C	T	-0.0874793	0.0183019	1.75485e-06	400	0.0540299	22.7321	0.442267	44.4065
CD40 levels	GCST90085714	rs4484212	C	T	-0.114945	0.0229445	5.45099e-07	400	0.0590389	24.9718	0.442267	44.4065
CD40 levels	GCST90085714	rs6065926	A	G	-0.151259	0.0205455	1.8096e-13	400	0.119333	53.9304	0.442267	44.4065
CD40 levels	GCST90085714	rs6151415	C	A	-0.177768	0.0379137	2.7487e-06	400	0.0520978	21.8745	0.442267	44.4065
CD40 levels	GCST90085714	rs6688462	C	G	0.0670081	0.0144091	3.31291e-06	400	0.0512924	21.5181	0.442267	44.4065
CD5L levels	GCST90085715	rs111499982	G	T	0.0970651	0.0207771	2.98667e-06	400	0.0517397	21.716	0.375368	33.6528
CD5L levels	GCST90085715	rs12819819	A	G	0.16176	0.0324019	5.96626e-07	400	0.0586532	24.7985	0.375368	33.6528
CD5L levels	GCST90085715	rs16961395	G	A	0.201341	0.0440124	4.77016e-06	400	0.0497174	20.8228	0.375368	33.6528
CD5L levels	GCST90085715	rs2765501	G	A	-0.119977	0.0249092	1.46035e-06	400	0.0548193	23.0835	0.375368	33.6528
CD5L levels	GCST90085715	rs36101166	A	G	0.133605	0.0287941	3.48413e-06	400	0.0510749	21.4219	0.375368	33.6528
CD5L levels	GCST90085715	rs72816440	T	C	0.150653	0.0313742	1.57237e-06	400	0.0545018	22.9421	0.375368	33.6528
CD5L levels	GCST90085715	rs9398364	G	T	0.136696	0.0283686	1.44598e-06	400	0.0548618	23.1024	0.375368	33.6528
CEACAM1 levels	GCST90085716	rs11224069	C	T	0.210562	0.0419121	5.06314e-07	400	0.0593539	25.1134	0.376545	33.822
CEACAM1 levels	GCST90085716	rs13119810	C	T	0.0817992	0.0175473	3.137e-06	400	0.0515278	21.6222	0.376545	33.822
CEACAM1 levels	GCST90085716	rs1455343	G	T	-0.0927357	0.0197357	2.61595e-06	400	0.0523111	21.9691	0.376545	33.822
CEACAM1 levels	GCST90085716	rs1547072	C	T	0.212437	0.0456658	3.28734e-06	400	0.0513259	21.5329	0.376545	33.822
CEACAM1 levels	GCST90085716	rs62407670	A	G	0.172312	0.034948	8.2005e-07	400	0.0572934	24.1886	0.376545	33.822
CEACAM1 levels	GCST90085716	rs7135151	T	G	-0.117323	0.0255696	4.46725e-06	400	0.0500011	20.9479	0.376545	33.822
CEACAM1 levels	GCST90085716	rs8021312	T	C	-0.110433	0.022947	1.49049e-06	400	0.0547316	23.0444	0.376545	33.822
CEACAM6 levels	GCST90085717	rs112973621	A	G	-0.172244	0.0366792	2.65348e-06	400	0.0522497	21.9418	0.321944	31.0996
CEACAM6 levels	GCST90085717	rs142514836	G	T	-0.209517	0.0432067	1.2398e-06	400	0.0555222	23.3969	0.321944	31.0996
CEACAM6 levels	GCST90085717	rs2056891	C	T	-0.0946264	0.020688	4.7856e-06	400	0.0497034	20.8166	0.321944	31.0996
CEACAM6 levels	GCST90085717	rs2072250	G	A	0.159821	0.0309532	2.42628e-07	400	0.0624847	26.5264	0.321944	31.0996
CEACAM6 levels	GCST90085717	rs214051	A	G	-0.0781727	0.0170864	4.75881e-06	400	0.0497277	20.8273	0.321944	31.0996
CEACAM6 levels	GCST90085717	rs7260229	G	A	-0.105072	0.0223735	2.64973e-06	400	0.0522558	21.9446	0.321944	31.0996
CFH levels	GCST90085718	rs6695321	A	G	0.0817383	0.0158179	2.37299e-07	400	0.062579	26.5691	0.062579	26.5691
CFHR1 levels	GCST90085719	rs13075489	T	C	-0.264616	0.0553919	1.7779e-06	400	0.0539737	22.7071	0.628505	94.7424
CFHR1 levels	GCST90085719	rs34455951	A	G	-0.283688	0.0616708	4.22428e-06	400	0.0502428	21.0545	0.628505	94.7424
CFHR1 levels	GCST90085719	rs35529939	A	C	-0.23093	0.0486343	2.0514e-06	400	0.0533582	22.4336	0.628505	94.7424
CFHR1 levels	GCST90085719	rs4254204	G	C	-0.195295	0.04238	4.06207e-06	400	0.050412	21.1292	0.628505	94.7424
CFHR1 levels	GCST90085719	rs60642321	A	G	0.0124205	0.000934279	2.50202e-40	400	0.306441	175.852	0.628505	94.7424
CFHR1 levels	GCST90085719	rs7664110	C	T	0.154628	0.0294709	1.54777e-07	400	0.0643904	27.3911	0.628505	94.7424
CFHR1 levels	GCST90085719	rs7818434	G	A	-0.213741	0.0467379	4.80347e-06	400	0.0496873	20.8095	0.628505	94.7424
cFib levels	GCST90085720	rs1132741	T	A	-0.802636	0.0582626	3.54481e-43	400	0.321785	188.835	0.374613	118.903
cFib levels	GCST90085720	rs9324805	G	T	0.166193	0.0351856	2.32035e-06	400	0.0528278	22.1981	0.374613	118.903
CTSB levels	GCST90085721	rs1736081	T	G	-0.140658	0.0222739	2.7025e-10	400	0.0906582	39.6792	0.194465	31.8662
CTSB levels	GCST90085721	rs6516581	G	A	0.1236	0.0266394	3.48825e-06	400	0.0510698	21.4197	0.194465	31.8662
CTSB levels	GCST90085721	rs72722276	C	T	0.139443	0.0295492	2.36984e-06	400	0.0527369	22.1578	0.194465	31.8662
Cystatin B levels	GCST90085722	rs35285321	G	A	0.153654	0.0161706	2.05718e-21	400	0.184156	89.8383	0.286024	52.8803
Cystatin B levels	GCST90085722	rs3792121	T	C	0.0546905	0.011973	4.92866e-06	400	0.049576	20.7605	0.286024	52.8803
Cystatin B levels	GCST90085722	rs3819441	A	G	0.142281	0.0302855	2.62724e-06	400	0.0522926	21.9608	0.286024	52.8803
Cystatin C levels	GCST90085723	rs114891100	C	A	-0.0407419	0.00889401	4.63143e-06	400	0.0498451	20.879	0.251973	26.5437
Cystatin C levels	GCST90085723	rs1553927	A	G	0.0584207	0.0127499	4.6046e-06	400	0.0498702	20.8901	0.251973	26.5437
Cystatin C levels	GCST90085723	rs2405367	G	A	0.0673582	0.0147114	4.68013e-06	400	0.0497998	20.8591	0.251973	26.5437
Cystatin C levels	GCST90085723	rs285583	T	C	-0.0690701	0.0149074	3.59911e-06	400	0.0509347	21.36	0.251973	26.5437
Cystatin C levels	GCST90085723	rs77896686	C	T	-0.0957786	0.0205472	3.14062e-06	400	0.0515229	21.62	0.251973	26.5437
DBH levels	GCST90085724	rs2519143	A	G	-0.652632	0.0686483	1.96455e-21	400	0.184308	89.929	0.23702	61.6639
DBH levels	GCST90085724	rs71469377	C	T	0.267487	0.0566968	2.38354e-06	400	0.052712	22.1468	0.23702	61.6639
DKK 1 levels	GCST90085725	rs17066359	G	A	0.270662	0.0556456	1.15025e-06	400	0.0558438	23.5404	0.166168	26.3053
DKK 1 levels	GCST90085725	rs17525274	A	G	0.343393	0.0692791	7.17122e-07	400	0.0578671	24.4457	0.166168	26.3053
DKK 1 levels	GCST90085725	rs2118280	G	A	-0.165171	0.0350994	2.52873e-06	400	0.0524573	22.0338	0.166168	26.3053
E Cad levels	GCST90085726	rs10280235	G	A	-0.119705	0.0254135	2.47378e-06	400	0.0525519	22.0758	0.419007	40.3867
E Cad levels	GCST90085726	rs12478822	C	G	0.120146	0.0257796	3.15413e-06	400	0.0515044	21.6118	0.419007	40.3867
E Cad levels	GCST90085726	rs3811402	G	C	-0.212129	0.0456242	3.32785e-06	400	0.051273	21.5095	0.419007	40.3867
E Cad levels	GCST90085726	rs492602	A	G	0.162967	0.0254061	1.41294e-10	400	0.0932701	40.94	0.419007	40.3867
E Cad levels	GCST90085726	rs635634	T	C	-0.0895434	0.0164058	4.81464e-08	400	0.069313	29.6411	0.419007	40.3867
E Cad levels	GCST90085726	rs6874015	G	C	-0.163813	0.0358684	4.94586e-06	400	0.049561	20.7538	0.419007	40.3867
E Cad levels	GCST90085726	rs7608448	T	C	-0.118982	0.0255221	3.13265e-06	400	0.0515338	21.6249	0.419007	40.3867
E Selectin levels	GCST90085727	rs13278625	C	T	0.189646	0.0414471	4.74818e-06	400	0.0497374	20.8316	0.438763	51.2064
E Selectin levels	GCST90085727	rs4566837	A	G	-0.159185	0.033741	2.38354e-06	400	0.052712	22.1468	0.438763	51.2064
E Selectin levels	GCST90085727	rs4919022	C	T	0.151836	0.0321512	2.32904e-06	400	0.0528117	22.191	0.438763	51.2064
E Selectin levels	GCST90085727	rs4936338	C	T	0.21334	0.0441452	1.34696e-06	400	0.0551664	23.2382	0.438763	51.2064
E Selectin levels	GCST90085727	rs635634	T	C	-0.221983	0.0241853	4.37374e-20	400	0.17397	83.8226	0.438763	51.2064
E Selectin levels	GCST90085727	rs78899905	C	T	0.343822	0.0716976	1.62307e-06	400	0.0543654	22.8814	0.438763	51.2064
EGF levels	GCST90085728	rs1436138	A	G	0.114619	0.0250358	4.6895e-06	400	0.0497912	20.8553	0.268654	28.9465
EGF levels	GCST90085728	rs17253063	A	G	-0.120652	0.0229018	1.37729e-07	400	0.0648841	27.6157	0.268654	28.9465
EGF levels	GCST90085728	rs1966497	G	A	-0.123331	0.0268779	4.46317e-06	400	0.0500051	20.9496	0.268654	28.9465
EGF levels	GCST90085728	rs58339775	T	G	-0.110766	0.0241173	4.37283e-06	400	0.0500934	20.9886	0.268654	28.9465
EGF levels	GCST90085728	rs7629131	T	C	-0.140809	0.0295026	1.81697e-06	400	0.0538803	22.6656	0.268654	28.9465
ENA 78 levels	GCST90085729	rs10503815	G	A	-0.331983	0.0723128	4.41276e-06	400	0.0500542	20.9713	0.387293	41.4027
ENA 78 levels	GCST90085729	rs10811875	G	A	-0.355807	0.0766559	3.45701e-06	400	0.0511086	21.4368	0.387293	41.4027
ENA 78 levels	GCST90085729	rs1404504	T	G	0.179405	0.0385609	3.27911e-06	400	0.0513367	21.5377	0.387293	41.4027
ENA 78 levels	GCST90085729	rs440676	C	A	0.411959	0.053944	2.22691e-14	400	0.127249	58.0291	0.387293	41.4027
ENA 78 levels	GCST90085729	rs4671113	C	A	-0.293917	0.0610485	1.47584e-06	400	0.054774	23.0633	0.387293	41.4027
ENA 78 levels	GCST90085729	rs4960360	G	A	0.192609	0.0408013	2.35096e-06	400	0.0527713	22.1731	0.387293	41.4027
Endostatin levels	GCST90085730	rs116994029	C	T	0.133121	0.0278125	1.69809e-06	400	0.0541712	22.795	0.381515	34.5439
Endostatin levels	GCST90085730	rs12482563	T	C	0.0719062	0.01558	3.92556e-06	400	0.0505597	21.1944	0.381515	34.5439
Endostatin levels	GCST90085730	rs12825219	A	C	0.0991602	0.0209904	2.31169e-06	400	0.0528439	22.2053	0.381515	34.5439
Endostatin levels	GCST90085730	rs140295961	G	A	0.141352	0.02942	1.55059e-06	400	0.0545617	22.9688	0.381515	34.5439
Endostatin levels	GCST90085730	rs147513159	G	C	0.123184	0.0267378	4.08322e-06	400	0.0503896	21.1193	0.381515	34.5439
Endostatin levels	GCST90085730	rs2730313	T	G	0.127995	0.0254392	4.86922e-07	400	0.0595205	25.1884	0.381515	34.5439
Endostatin levels	GCST90085730	rs978262	C	T	0.128619	0.025575	4.92856e-07	400	0.0594688	25.1651	0.381515	34.5439
Eotaxin 2 levels	GCST90085731	rs35802534	G	A	0.220833	0.0447691	8.10968e-07	400	0.0573411	24.21	0.469945	69.8638
Eotaxin 2 levels	GCST90085731	rs7156204	C	T	-0.383356	0.0834786	4.3846e-06	400	0.0500818	20.9835	0.469945	69.8638
Eotaxin 2 levels	GCST90085731	rs7778977	A	G	0.275399	0.0574354	1.62722e-06	400	0.0543544	22.8765	0.469945	69.8638
Eotaxin 2 levels	GCST90085731	rs7799486	G	C	0.579075	0.0494015	9.85566e-32	400	0.255676	136.714	0.469945	69.8638
Eotaxin 2 levels	GCST90085731	rs9297812	A	G	-0.245553	0.0521631	2.50886e-06	400	0.0524913	22.0489	0.469945	69.8638
ErbB3 levels	GCST90085732	rs10933346	C	T	-0.182111	0.0388849	2.82237e-06	400	0.0519837	21.824	0.373592	39.0644
ErbB3 levels	GCST90085732	rs11904400	T	C	0.239088	0.0510558	2.82876e-06	400	0.051974	21.8197	0.373592	39.0644
ErbB3 levels	GCST90085732	rs4146882	T	G	0.376342	0.0719255	1.67336e-07	400	0.0640601	27.241	0.373592	39.0644
ErbB3 levels	GCST90085732	rs5030044	A	G	-0.325992	0.0524097	4.96952e-10	400	0.0881927	38.4957	0.373592	39.0644
ErbB3 levels	GCST90085732	rs62495016	G	A	-0.304841	0.0643931	2.20075e-06	400	0.0530556	22.2992	0.373592	39.0644
ErbB3 levels	GCST90085732	rs7257306	T	C	0.156316	0.0298087	1.57159e-07	400	0.0643257	27.3617	0.373592	39.0644
FAS levels	GCST90085733	rs11144612	C	T	-0.17319	0.0326686	1.14899e-07	400	0.0656501	27.9646	0.567405	51.0225
FAS levels	GCST90085733	rs11257863	A	G	0.158569	0.0320572	7.55792e-07	400	0.0576425	24.345	0.567405	51.0225
FAS levels	GCST90085733	rs116098252	T	C	-0.290601	0.0623015	3.09478e-06	400	0.0515863	21.6481	0.567405	51.0225
FAS levels	GCST90085733	rs12060961	T	C	0.16348	0.0343593	1.95571e-06	400	0.0535637	22.5249	0.567405	51.0225
FAS levels	GCST90085733	rs146266536	G	A	-0.223951	0.0463435	1.34895e-06	400	0.05516	23.2354	0.567405	51.0225
FAS levels	GCST90085733	rs4870079	G	A	-0.1511	0.0327114	3.85248e-06	400	0.0506409	21.2302	0.567405	51.0225
FAS levels	GCST90085733	rs61864841	C	A	0.181914	0.0394947	4.10421e-06	400	0.0503674	21.1095	0.567405	51.0225
FAS levels	GCST90085733	rs635634	T	C	0.213962	0.0363176	3.82893e-09	400	0.0798438	34.5353	0.567405	51.0225
FAS levels	GCST90085733	rs7076197	C	T	-0.242748	0.0516245	2.574e-06	400	0.0523808	21.9999	0.567405	51.0225
FAS levels	GCST90085733	rs76861039	T	C	-0.170119	0.036856	3.91644e-06	400	0.0505698	21.1988	0.567405	51.0225
Fetuin A levels	GCST90085734	rs11211962	A	G	0.0852283	0.0180953	2.47767e-06	400	0.0525452	22.0728	0.365189	45.3315
Fetuin A levels	GCST90085734	rs138416884	G	A	-0.169651	0.0346854	1.00252e-06	400	0.056433	23.8037	0.365189	45.3315
Fetuin A levels	GCST90085734	rs17704475	C	T	-0.175383	0.0382686	4.58476e-06	400	0.0498888	20.8984	0.365189	45.3315
Fetuin A levels	GCST90085734	rs2070633	T	C	-0.0782294	0.00910814	8.77623e-18	400	0.155709	73.4013	0.365189	45.3315
Fetuin A levels	GCST90085734	rs3212197	T	C	0.145745	0.031561	3.87699e-06	400	0.0506135	21.2181	0.365189	45.3315
Ficolin 3 levels	GCST90085735	rs115883043	G	T	0.218136	0.0473374	4.06361e-06	400	0.0504104	21.1284	0.296891	33.2736
Ficolin 3 levels	GCST90085735	rs2504780	A	T	-0.19502	0.0309805	3.07521e-10	400	0.0901362	39.4281	0.296891	33.2736
Ficolin 3 levels	GCST90085735	rs36082200	G	A	0.123961	0.0262752	2.38399e-06	400	0.0527112	22.1464	0.296891	33.2736
Ficolin 3 levels	GCST90085735	rs45223	A	G	-0.0878651	0.0191361	4.39876e-06	400	0.0500679	20.9773	0.296891	33.2736
Ficolin 3 levels	GCST90085735	rs72749374	G	A	0.089926	0.0188999	1.95511e-06	400	0.053565	22.5255	0.296891	33.2736
Galectin 3 levels	GCST90085736	rs112215480	C	G	0.327527	0.063583	2.58869e-07	400	0.0622096	26.4019	0.674455	73.0769
Galectin 3 levels	GCST90085736	rs117165034	G	A	0.33296	0.0682304	1.06123e-06	400	0.0561891	23.6947	0.674455	73.0769
Galectin 3 levels	GCST90085736	rs1572976	T	C	0.223075	0.042961	2.07498e-07	400	0.0631484	26.8272	0.674455	73.0769
Galectin 3 levels	GCST90085736	rs4731541	C	G	-0.147191	0.0321423	4.66397e-06	400	0.0498148	20.8657	0.674455	73.0769
Galectin 3 levels	GCST90085736	rs57918209	G	A	0.123446	0.025629	1.45982e-06	400	0.0548209	23.0842	0.674455	73.0769
Galectin 3 levels	GCST90085736	rs59209438	C	T	0.246287	0.0523437	2.53643e-06	400	0.0524442	22.028	0.674455	73.0769
Galectin 3 levels	GCST90085736	rs62266457	A	C	0.282938	0.0544187	2.00065e-07	400	0.0633031	26.8973	0.674455	73.0769
Galectin 3 levels	GCST90085736	rs6555117	A	G	-0.129489	0.0280047	3.76683e-06	400	0.050738	21.2731	0.674455	73.0769
Galectin 3 levels	GCST90085736	rs6573006	T	C	0.193727	0.0338282	1.02347e-08	400	0.0757774	32.6322	0.674455	73.0769
Galectin 3 levels	GCST90085736	rs72677013	G	T	0.343796	0.0604223	1.27116e-08	400	0.074877	32.2131	0.674455	73.0769
Galectin 3 levels	GCST90085736	rs73010515	G	T	0.25569	0.0461985	3.11941e-08	400	0.0711322	30.4786	0.674455	73.0769
GDF 15 levels	GCST90085737	rs10878036	C	T	-0.149605	0.0319395	2.81303e-06	400	0.051998	21.8303	0.426423	41.633
GDF 15 levels	GCST90085737	rs10936959	A	G	0.0939029	0.0202173	3.40599e-06	400	0.0511728	21.4652	0.426423	41.633
GDF 15 levels	GCST90085737	rs1227734	C	T	-0.212529	0.0292405	3.64057e-13	400	0.116663	52.564	0.426423	41.633
GDF 15 levels	GCST90085737	rs7539214	A	G	-0.0944231	0.0198243	1.90745e-06	400	0.0536712	22.5726	0.426423	41.633
GDF 15 levels	GCST90085737	rs939885	G	A	-0.080084	0.0168903	2.1223e-06	400	0.0532119	22.3686	0.426423	41.633
GDF 15 levels	GCST90085737	rs9490814	G	A	-0.186909	0.0408627	4.78352e-06	400	0.0497053	20.8175	0.426423	41.633
GDF 15 levels	GCST90085737	rs9768304	T	C	0.169669	0.0369781	4.46704e-06	400	0.0500013	20.9479	0.426423	41.633
Haptoglobin levels	GCST90085738	rs10068106	A	C	-0.168675	0.0344256	9.59787e-07	400	0.0566197	23.8871	0.265814	28.5298
Haptoglobin levels	GCST90085738	rs3213423	T	G	0.0533574	0.0108964	9.74212e-07	400	0.0565558	23.8585	0.265814	28.5298
Haptoglobin levels	GCST90085738	rs35674999	C	A	0.269165	0.0582971	3.89078e-06	400	0.0505982	21.2113	0.265814	28.5298
Haptoglobin levels	GCST90085738	rs75707753	C	A	0.292976	0.0640785	4.82769e-06	400	0.0496656	20.7999	0.265814	28.5298
Haptoglobin levels	GCST90085738	rs9931199	T	C	0.0671607	0.0142837	2.57731e-06	400	0.0523753	21.9975	0.265814	28.5298
HCC 4 levels	GCST90085739	rs10108069	C	T	0.344328	0.0702829	9.62437e-07	400	0.0566079	23.8818	0.726229	103.19
HCC 4 levels	GCST90085739	rs10445391	A	G	0.759862	0.0683671	1.06733e-28	400	0.235957	122.913	0.726229	103.19
HCC 4 levels	GCST90085739	rs11061229	G	C	0.23316	0.0470584	7.2448e-07	400	0.0578235	24.4261	0.726229	103.19
HCC 4 levels	GCST90085739	rs113948009	G	A	0.351273	0.0760312	3.83518e-06	400	0.0506604	21.2388	0.726229	103.19
HCC 4 levels	GCST90085739	rs1457094	C	T	0.346609	0.0682797	3.84829e-07	400	0.0605233	25.6401	0.726229	103.19
HCC 4 levels	GCST90085739	rs17719708	T	C	0.326025	0.0675732	1.40169e-06	400	0.0549954	23.162	0.726229	103.19
HCC 4 levels	GCST90085739	rs2071761	C	T	0.228474	0.0487498	2.77701e-06	400	0.0520536	21.8549	0.726229	103.19
HCC 4 levels	GCST90085739	rs28823386	C	T	0.315313	0.0670685	2.58433e-06	400	0.0523635	21.9923	0.726229	103.19
HCC 4 levels	GCST90085739	rs477623	T	C	0.176179	0.0383683	4.39484e-06	400	0.0500717	20.979	0.726229	103.19
HCC 4 levels	GCST90085739	rs7778055	T	C	0.362069	0.0749157	1.34482e-06	400	0.0551732	23.2412	0.726229	103.19
IGFBP 2 levels	GCST90085740	rs10279626	G	C	-0.142841	0.0308124	3.55513e-06	400	0.0509878	21.3834	0.371066	33.0395
IGFBP 2 levels	GCST90085740	rs596647	A	C	0.203826	0.041271	7.86318e-07	400	0.0574731	24.2691	0.371066	33.0395
IGFBP 2 levels	GCST90085740	rs62169493	C	T	0.159976	0.033766	2.16078e-06	400	0.0531346	22.3343	0.371066	33.0395
IGFBP 2 levels	GCST90085740	rs79132505	A	G	0.338322	0.0716549	2.34061e-06	400	0.0527903	22.1815	0.371066	33.0395
IGFBP 2 levels	GCST90085740	rs8084427	T	C	-0.300735	0.0619784	1.22069e-06	400	0.0555888	23.4266	0.371066	33.0395
IGFBP 2 levels	GCST90085740	rs9341105	A	G	-0.169396	0.0366711	3.84961e-06	400	0.0506441	21.2316	0.371066	33.0395
IGFBP 2 levels	GCST90085740	rs976902	A	G	0.160758	0.0348725	4.02933e-06	400	0.050447	21.1446	0.371066	33.0395
IGFBP 3 levels	GCST90085741	rs10787108	G	A	-0.111347	0.0210703	1.26027e-07	400	0.0652595	27.7866	0.234848	30.3093
IGFBP 3 levels	GCST90085741	rs2854746	G	C	0.095538	0.0183536	1.93559e-07	400	0.0634433	26.9609	0.234848	30.3093
IGFBP 3 levels	GCST90085741	rs2953249	G	A	-0.0982193	0.0201503	1.09169e-06	400	0.0560678	23.6405	0.234848	30.3093
IGFBP 3 levels	GCST90085741	rs6979049	A	G	0.0909992	0.0198168	4.3895e-06	400	0.050077	20.9813	0.234848	30.3093
IL 18 levels	GCST90085742	rs11132048	A	T	0.122088	0.0261452	3.01777e-06	400	0.051695	21.6962	0.262364	28.0278
IL 18 levels	GCST90085742	rs113920843	C	G	0.237802	0.0510242	3.15346e-06	400	0.0515053	21.6122	0.262364	28.0278
IL 18 levels	GCST90085742	rs2115763	A	T	-0.144651	0.0300616	1.49556e-06	400	0.054717	23.0379	0.262364	28.0278
IL 18 levels	GCST90085742	rs6497408	G	A	0.16006	0.0335616	1.85023e-06	400	0.0538022	22.6309	0.262364	28.0278
IL 18 levels	GCST90085742	rs78452771	C	T	0.212682	0.0460412	3.84904e-06	400	0.0506448	21.2319	0.262364	28.0278
IL 1RI levels	GCST90085743	rs10510873	T	C	0.232064	0.046323	5.45175e-07	400	0.0590383	24.9715	1.45181	-48.0715
IL 1RI levels	GCST90085743	rs10767032	A	T	-0.119187	0.0252297	2.31161e-06	400	0.052844	22.2053	1.45181	-48.0715
IL 1RI levels	GCST90085743	rs11163298	C	T	0.221845	0.0389499	1.22897e-08	400	0.0750173	32.2783	1.45181	-48.0715
IL 1RI levels	GCST90085743	rs12359216	C	T	0.159634	0.0330435	1.35833e-06	400	0.0551303	23.2221	1.45181	-48.0715
IL 1RI levels	GCST90085743	rs12817646	A	G	0.126035	0.0241963	1.90032e-07	400	0.0635212	26.9963	1.45181	-48.0715
IL 1RI levels	GCST90085743	rs13018048	A	T	0.159642	0.0333577	1.70342e-06	400	0.0541577	22.789	1.45181	-48.0715
IL 1RI levels	GCST90085743	rs1911253	G	A	-0.0771696	0.01643	2.64188e-06	400	0.0522686	21.9502	1.45181	-48.0715
IL 1RI levels	GCST90085743	rs2004431	T	G	0.142727	0.0277871	2.79971e-07	400	0.0618766	26.2512	1.45181	-48.0715
IL 1RI levels	GCST90085743	rs2273571	C	T	0.109361	0.0238595	4.57153e-06	400	0.0499013	20.9039	1.45181	-48.0715
IL 1RI levels	GCST90085743	rs2307205	G	A	0.211401	0.0460906	4.50414e-06	400	0.0499655	20.9322	1.45181	-48.0715
IL 1RI levels	GCST90085743	rs2444887	G	T	-0.0840485	0.0181907	3.82972e-06	400	0.0506665	21.2415	1.45181	-48.0715
IL 1RI levels	GCST90085743	rs2841296	C	T	-0.0809205	0.0174916	3.72359e-06	400	0.0507879	21.2951	1.45181	-48.0715
IL 1RI levels	GCST90085743	rs2993782	A	G	0.236334	0.0496756	1.95971e-06	400	0.0535549	22.521	1.45181	-48.0715
IL 1RI levels	GCST90085743	rs35065569	G	A	0.212012	0.0407948	2.02477e-07	400	0.0632523	26.8743	1.45181	-48.0715
IL 1RI levels	GCST90085743	rs4682729	A	G	0.205633	0.0425308	1.33204e-06	400	0.0552142	23.2595	1.45181	-48.0715
IL 1RI levels	GCST90085743	rs4749923	C	G	-0.230738	0.0365769	2.82134e-10	400	0.0904844	39.5956	1.45181	-48.0715
IL 1RI levels	GCST90085743	rs4919027	C	A	0.157685	0.0319306	7.87889e-07	400	0.0574646	24.2653	1.45181	-48.0715
IL 1RI levels	GCST90085743	rs4962093	T	C	0.211642	0.0448115	2.32452e-06	400	0.05282	22.1947	1.45181	-48.0715
IL 1RI levels	GCST90085743	rs72754124	C	T	0.142202	0.0288089	7.97199e-07	400	0.0574143	24.2428	1.45181	-48.0715
IL 1RI levels	GCST90085743	rs72776322	A	T	0.127292	0.0265415	1.61889e-06	400	0.0543765	22.8863	1.45181	-48.0715
IL 1RI levels	GCST90085743	rs7530836	G	T	0.199609	0.0366015	4.93624e-08	400	0.0692082	29.593	1.45181	-48.0715
IL 1RI levels	GCST90085743	rs7679050	G	A	0.183965	0.0365093	4.68316e-07	400	0.0596866	25.2631	1.45181	-48.0715
IL 1RI levels	GCST90085743	rs78168195	C	G	0.176996	0.0386269	4.60136e-06	400	0.0498732	20.8915	1.45181	-48.0715
IL 1RI levels	GCST90085743	rs7843874	T	G	-0.147449	0.0311559	2.21642e-06	400	0.0530251	22.2857	1.45181	-48.0715
IL 1RI levels	GCST90085743	rs9341388	T	G	0.130693	0.0258063	4.09706e-07	400	0.0602565	25.5198	1.45181	-48.0715
IL 1RII levels	GCST90085744	rs1024914	A	G	0.106669	0.0227361	2.7108e-06	400	0.0521576	21.901	1.11082	-200.47
IL 1RII levels	GCST90085744	rs10514574	A	C	0.0916361	0.020012	4.67088e-06	400	0.0498084	20.8629	1.11082	-200.47
IL 1RII levels	GCST90085744	rs10903068	T	C	-0.145611	0.0318937	4.98247e-06	400	0.0495291	20.7398	1.11082	-200.47
IL 1RII levels	GCST90085744	rs111545693	A	C	0.190838	0.0375556	3.74521e-07	400	0.0606389	25.6923	1.11082	-200.47
IL 1RII levels	GCST90085744	rs11691240	C	T	0.0974858	0.0163725	2.61273e-09	400	0.0814165	35.2758	1.11082	-200.47
IL 1RII levels	GCST90085744	rs12570945	G	A	0.269276	0.0444106	1.33335e-09	400	0.0841735	36.5801	1.11082	-200.47
IL 1RII levels	GCST90085744	rs13400099	T	C	0.165148	0.0318655	2.18747e-07	400	0.0629245	26.7256	1.11082	-200.47
IL 1RII levels	GCST90085744	rs17096352	T	C	0.181867	0.0387455	2.68063e-06	400	0.0522059	21.9224	1.11082	-200.47
IL 1RII levels	GCST90085744	rs17581068	C	A	0.177501	0.0363415	1.03819e-06	400	0.0562832	23.7367	1.11082	-200.47
IL 1RII levels	GCST90085744	rs2273847	A	G	0.196277	0.0415693	2.33894e-06	400	0.0527934	22.1829	1.11082	-200.47
IL 1RII levels	GCST90085744	rs2498001	C	T	0.0959867	0.0209701	4.71008e-06	400	0.0497722	20.8469	1.11082	-200.47
IL 1RII levels	GCST90085744	rs61838432	C	T	0.171088	0.0373871	4.73681e-06	400	0.0497478	20.8362	1.11082	-200.47
IL 1RII levels	GCST90085744	rs61877610	G	A	0.176604	0.0299285	3.61588e-09	400	0.0800797	34.6462	1.11082	-200.47
IL 1RII levels	GCST90085744	rs62231478	T	C	0.172761	0.0356228	1.2362e-06	400	0.0555346	23.4024	1.11082	-200.47
IL 1RII levels	GCST90085744	rs7095420	A	G	0.171083	0.0365012	2.77173e-06	400	0.0520618	21.8586	1.11082	-200.47
IL 1RII levels	GCST90085744	rs72954754	G	A	0.151735	0.0313588	1.30709e-06	400	0.0552954	23.2957	1.11082	-200.47
IL 1RII levels	GCST90085744	rs73356349	G	T	0.21032	0.0449593	2.89677e-06	400	0.0518715	21.7743	1.11082	-200.47
IL 1RII levels	GCST90085744	rs77863929	T	C	0.194322	0.0386525	4.97147e-07	400	0.0594318	25.1485	1.11082	-200.47
IL 1RII levels	GCST90085744	rs78317450	T	C	0.199322	0.0412723	1.36916e-06	400	0.0550962	23.2069	1.11082	-200.47
IL 2 receptor_alpha levels	GCST90085745	rs12705748	A	C	0.0943055	0.0206475	4.93801e-06	400	0.0495678	20.7569	0.266768	48.0249
IL 2 receptor_alpha levels	GCST90085745	rs12722497	C	A	-0.312448	0.0350737	5.18089e-19	400	0.165551	78.9615	0.266768	48.0249
IL 2 receptor_alpha levels	GCST90085745	rs6455175	C	A	0.0850296	0.0182177	3.0501e-06	400	0.051649	21.6759	0.266768	48.0249
IL 6r levels	GCST90085746	rs12126142	G	A	-0.278475	0.0234287	1.39812e-32	400	0.26101	140.573	0.533944	75.0411
IL 6r levels	GCST90085746	rs165155	T	C	0.175003	0.0336469	1.98054e-07	400	0.0633459	26.9168	0.533944	75.0411
IL 6r levels	GCST90085746	rs2535759	G	A	0.178495	0.0388237	4.2744e-06	400	0.0501919	21.032	0.533944	75.0411
IL 6r levels	GCST90085746	rs575376	T	A	0.103982	0.0222949	3.10238e-06	400	0.0515757	21.6434	0.533944	75.0411
IL 6r levels	GCST90085746	rs78572740	G	A	0.195029	0.0395153	7.99307e-07	400	0.057403	24.2377	0.533944	75.0411
IL 6r levels	GCST90085746	rs80213007	A	G	0.240162	0.0521131	4.05638e-06	400	0.0504181	21.1318	0.533944	75.0411
Kallikrein 5 levels	GCST90085747	rs11553092	G	A	-0.239865	0.0306962	5.53313e-15	400	0.132436	60.7558	0.345126	41.5285
Kallikrein 5 levels	GCST90085747	rs2497409	T	C	0.159315	0.0320274	6.547e-07	400	0.0582564	24.6203	0.345126	41.5285
Kallikrein 5 levels	GCST90085747	rs61509461	G	A	0.238965	0.05206	4.42864e-06	400	0.0500386	20.9644	0.345126	41.5285
Kallikrein 5 levels	GCST90085747	rs6447872	G	A	-0.139221	0.0301575	3.90328e-06	400	0.0505843	21.2052	0.345126	41.5285
Kallikrein 5 levels	GCST90085747	rs72888948	C	A	0.209889	0.0440062	1.84655e-06	400	0.0538108	22.6347	0.345126	41.5285
KLK 7 levels	GCST90085748	rs12023645	C	T	-0.164201	0.0344352	1.85698e-06	400	0.0537866	22.6239	0.166409	26.3511
KLK 7 levels	GCST90085748	rs4797329	G	A	-0.102262	0.0204185	5.49155e-07	400	0.0590072	24.9576	0.166409	26.3511
KLK 7 levels	GCST90085748	rs78353057	C	T	-0.170713	0.0358613	1.93241e-06	400	0.0536153	22.5478	0.166409	26.3511
Lp a levels	GCST90085749	rs1030052	C	T	-0.453516	0.098966	4.59353e-06	400	0.0498806	20.8947	0.371281	33.07
Lp a levels	GCST90085749	rs11198973	G	T	-0.521652	0.108344	1.47362e-06	400	0.0547805	23.0662	0.371281	33.07
Lp a levels	GCST90085749	rs35624710	G	A	-0.487338	0.100748	1.31676e-06	400	0.0552637	23.2816	0.371281	33.07
Lp a levels	GCST90085749	rs4646272	T	G	-0.822869	0.166411	7.62167e-07	400	0.0576066	24.3289	0.371281	33.07
Lp a levels	GCST90085749	rs7925676	A	T	-0.539621	0.117639	4.49444e-06	400	0.0499749	20.9363	0.371281	33.07
Lp a levels	GCST90085749	rs8056677	A	C	-0.441893	0.0922723	1.67601e-06	400	0.0542275	22.82	0.371281	33.07
Lp a levels	GCST90085749	rs9968113	T	A	0.471839	0.103328	4.96151e-06	400	0.0495473	20.7478	0.371281	33.07
LRG1 levels	GCST90085750	rs34182375	T	C	-0.138621	0.0201105	5.46351e-12	400	0.106172	47.2756	0.373053	38.9746
LRG1 levels	GCST90085750	rs56053904	A	G	-0.145948	0.0306269	1.88517e-06	400	0.0537218	22.5951	0.373053	38.9746
LRG1 levels	GCST90085750	rs6135574	T	C	-0.243568	0.0478971	3.6716e-07	400	0.0607235	25.7304	0.373053	38.9746
LRG1 levels	GCST90085750	rs73019222	C	T	-0.162684	0.0350694	3.50245e-06	400	0.0510522	21.4119	0.373053	38.9746
LRG1 levels	GCST90085750	rs79022496	G	C	-0.166298	0.0359422	3.7134e-06	400	0.0507997	21.3003	0.373053	38.9746
LRG1 levels	GCST90085750	rs80136093	G	A	-0.16612	0.0359842	3.90329e-06	400	0.0505843	21.2052	0.373053	38.9746
MCP 2 levels	GCST90085751	rs115383232	T	C	-0.277665	0.057117	1.16595e-06	400	0.0557856	23.5144	0.448442	39.7376
MCP 2 levels	GCST90085751	rs1490715	C	T	-0.267324	0.0569357	2.6635e-06	400	0.0522335	21.9347	0.448442	39.7376
MCP 2 levels	GCST90085751	rs16859370	A	C	-0.189725	0.0378573	5.39887e-07	400	0.0590799	24.9902	0.448442	39.7376
MCP 2 levels	GCST90085751	rs72782321	C	T	-0.184369	0.0386973	1.89429e-06	400	0.053701	22.5859	0.448442	39.7376
MCP 2 levels	GCST90085751	rs73331198	C	T	-0.301205	0.0630182	1.75602e-06	400	0.054027	22.7308	0.448442	39.7376
MCP 2 levels	GCST90085751	rs76125976	G	A	-0.243462	0.0439375	3.00558e-08	400	0.0712878	30.5504	0.448442	39.7376
MCP 2 levels	GCST90085751	rs7753899	C	T	-0.291794	0.0621911	2.70678e-06	400	0.052164	21.9039	0.448442	39.7376
MCP 2 levels	GCST90085751	rs79133150	G	A	-0.205562	0.0447244	4.30278e-06	400	0.0501633	21.0194	0.448442	39.7376
MCP 4 levels	GCST90085752	rs12075	G	A	-0.159511	0.0282102	1.56417e-08	400	0.0740139	31.8121	0.0740139	31.8121
MIF levels	GCST90085753	rs43165	G	A	-0.178468	0.0377659	2.29378e-06	400	0.0528774	22.2201	0.155259	24.261
MIF levels	GCST90085753	rs55669453	G	C	0.241699	0.0529198	4.94123e-06	400	0.049565	20.7556	0.155259	24.261
MIF levels	GCST90085753	rs76859228	T	C	0.117219	0.0248199	2.32618e-06	400	0.0528169	22.1933	0.155259	24.261
MIP 1_beta levels	GCST90085754	rs2062370	G	C	0.208062	0.0448666	3.52906e-06	400	0.0510196	21.3975	0.238139	30.8667
MIP 1_beta levels	GCST90085754	rs2831809	T	C	0.314732	0.0664886	2.20549e-06	400	0.0530464	22.2951	0.238139	30.8667
MIP 1_beta levels	GCST90085754	rs7028015	T	C	-0.411588	0.0861545	1.77639e-06	400	0.0539774	22.7088	0.238139	30.8667
MIP 1_beta levels	GCST90085754	rs8064426	G	A	0.303129	0.0513649	3.60233e-09	400	0.0800952	34.6534	0.238139	30.8667
MMP 1 levels	GCST90085755	rs1836210	C	T	0.265116	0.0568587	3.12063e-06	400	0.0515504	21.6322	0.376796	47.6433
MMP 1 levels	GCST90085755	rs4454627	C	T	0.280009	0.0601673	3.25812e-06	400	0.0513644	21.5499	0.376796	47.6433
MMP 1 levels	GCST90085755	rs4549549	C	T	-0.401257	0.0870394	4.02542e-06	400	0.0504512	21.1464	0.376796	47.6433
MMP 1 levels	GCST90085755	rs471994	G	A	0.322571	0.0361721	4.76248e-19	400	0.165841	79.127	0.376796	47.6433
MMP 1 levels	GCST90085755	rs9539478	A	T	-0.446712	0.0903537	7.65239e-07	400	0.0575894	24.3212	0.376796	47.6433
MMP 10 levels	GCST90085756	rs486055	C	T	0.208878	0.0387998	7.30603e-08	400	0.0675596	28.8369	0.136577	31.3988
MMP 10 levels	GCST90085756	rs7622746	G	A	0.166556	0.030586	5.16602e-08	400	0.0690172	29.5052	0.136577	31.3988
MMP 3 levels	GCST90085757	rs1010698	G	T	0.158734	0.0234719	1.35438e-11	400	0.102604	45.5055	0.41881	40.354
MMP 3 levels	GCST90085757	rs12476661	G	A	0.107869	0.0231889	3.29106e-06	400	0.051321	21.5307	0.41881	40.354
MMP 3 levels	GCST90085757	rs225378	A	G	-0.104537	0.0218208	1.6621e-06	400	0.0542633	22.8359	0.41881	40.354
MMP 3 levels	GCST90085757	rs34721590	C	G	-0.112888	0.0245282	4.17665e-06	400	0.0502918	21.0761	0.41881	40.354
MMP 3 levels	GCST90085757	rs4786891	C	T	-0.106974	0.0220868	1.27674e-06	400	0.0553962	23.3407	0.41881	40.354
MMP 3 levels	GCST90085757	rs7094085	A	G	0.168499	0.0365331	3.98381e-06	400	0.0504961	21.1663	0.41881	40.354
MMP 3 levels	GCST90085757	rs72738981	G	A	-0.144092	0.0300266	1.59618e-06	400	0.0544372	22.9133	0.41881	40.354
MMP 7 levels	GCST90085758	rs2169311	T	C	-0.10272	0.0223801	4.43636e-06	400	0.0500311	20.9611	0.329296	32.1586
MMP 7 levels	GCST90085758	rs234856	G	T	-0.110762	0.024005	3.9475e-06	400	0.0505356	21.1837	0.329296	32.1586
MMP 7 levels	GCST90085758	rs56857975	C	T	-0.20978	0.0420235	5.97688e-07	400	0.0586456	24.7951	0.329296	32.1586
MMP 7 levels	GCST90085758	rs6542705	A	C	-0.12384	0.0256254	1.34708e-06	400	0.055166	23.238	0.329296	32.1586
MMP 7 levels	GCST90085758	rs7029465	A	G	0.213439	0.0432522	8.02479e-07	400	0.0573861	24.2301	0.329296	32.1586
MMP 7 levels	GCST90085758	rs9297945	A	G	0.0940532	0.0190337	7.7563e-07	400	0.0575317	24.2954	0.329296	32.1586
MPIF 1 levels	GCST90085759	rs339428	A	G	0.0873633	0.0190314	4.42241e-06	400	0.0500447	20.9671	0.463163	42.1675
MPIF 1 levels	GCST90085759	rs62575203	G	A	-0.177878	0.0384026	3.62252e-06	400	0.0509067	21.3476	0.463163	42.1675
MPIF 1 levels	GCST90085759	rs712048	C	A	0.237958	0.036217	5.01998e-11	400	0.0974106	42.9535	0.463163	42.1675
MPIF 1 levels	GCST90085759	rs7463533	A	G	0.104948	0.0227855	4.10621e-06	400	0.0503653	21.1085	0.463163	42.1675
MPIF 1 levels	GCST90085759	rs7573210	A	C	-0.114509	0.0246164	3.29167e-06	400	0.0513202	21.5304	0.463163	42.1675
MPIF 1 levels	GCST90085759	rs7895688	G	T	0.137914	0.0280065	8.46443e-07	400	0.0571578	24.1279	0.463163	42.1675
MPIF 1 levels	GCST90085759	rs9621049	C	T	0.171257	0.0371489	4.02655e-06	400	0.05045	21.1459	0.463163	42.1675
MPIF 1 levels	GCST90085759	rs9866348	C	A	0.115945	0.0239136	1.24401e-06	400	0.0555076	23.3904	0.463163	42.1675
MSLN levels	GCST90085760	rs2235503	C	A	-0.206475	0.0264223	5.52108e-15	400	0.132444	60.76	0.184481	44.9033
MSLN levels	GCST90085760	rs72702693	C	T	-0.238276	0.0508499	2.78764e-06	400	0.0520371	21.8477	0.184481	44.9033
MSP levels	GCST90085761	rs11709525	C	T	0.011685	0.00108505	4.81801e-27	400	0.224766	115.393	0.280023	77.2032
MSP levels	GCST90085761	rs13006828	G	A	0.0959179	0.0198304	1.31876e-06	400	0.0552572	23.2787	0.280023	77.2032
NT proBNP levels	GCST90085762	rs198389	A	G	-0.270286	0.05901	4.64212e-06	400	0.0498351	20.8747	0.253713	26.7894
NT proBNP levels	GCST90085762	rs56403597	T	G	0.523012	0.113676	4.20678e-06	400	0.0502608	21.0624	0.253713	26.7894
NT proBNP levels	GCST90085762	rs71316301	A	G	0.398029	0.0861942	3.87796e-06	400	0.0506124	21.2176	0.253713	26.7894
NT proBNP levels	GCST90085762	rs7224107	C	T	0.564173	0.121696	3.55378e-06	400	0.0509894	21.3842	0.253713	26.7894
NT proBNP levels	GCST90085762	rs76150224	T	G	-0.488374	0.104245	2.8016e-06	400	0.0520156	21.8381	0.253713	26.7894
Omentin levels	GCST90085763	rs34067571	G	A	0.0236838	0.00247639	1.13444e-21	400	0.186111	91.0101	0.457247	55.181
Omentin levels	GCST90085763	rs3778449	G	A	-0.243776	0.0503939	1.31542e-06	400	0.0552681	23.2835	0.457247	55.181
Omentin levels	GCST90085763	rs4604542	G	A	0.172419	0.035222	9.82018e-07	400	0.0565216	23.8432	0.457247	55.181
Omentin levels	GCST90085763	rs4786555	T	G	0.117878	0.0248694	2.13829e-06	400	0.0531796	22.3543	0.457247	55.181
Omentin levels	GCST90085763	rs56333307	G	A	-0.14295	0.0296077	1.37805e-06	400	0.0550684	23.1945	0.457247	55.181
Omentin levels	GCST90085763	rs9381019	A	T	-0.130387	0.0280938	3.46533e-06	400	0.0510983	21.4323	0.457247	55.181
PARC levels	GCST90085764	rs1102934	A	G	-0.285501	0.0293687	2.44691e-22	400	0.191107	94.0307	0.244895	64.3773
PARC levels	GCST90085764	rs28680396	G	A	0.159906	0.0335343	1.85659e-06	400	0.0537875	22.6243	0.244895	64.3773
PECAM 1 levels	GCST90085765	rs116266901	G	A	0.212602	0.038685	3.8913e-08	400	0.0702061	30.0519	0.271628	36.8264
PECAM 1 levels	GCST90085765	rs635634	T	C	-0.0910169	0.0137655	3.79246e-11	400	0.0985268	43.4995	0.271628	36.8264
PECAM 1 levels	GCST90085765	rs72663673	C	T	-0.136957	0.0290251	2.3752e-06	400	0.0527271	22.1535	0.271628	36.8264
PECAM 1 levels	GCST90085765	rs8111919	G	A	-0.110401	0.0240189	4.29787e-06	400	0.0501682	21.0215	0.271628	36.8264
PEDF levels	GCST90085766	rs6502953	G	A	0.0652539	0.0124265	1.51114e-07	400	0.0644918	27.4372	0.116169	26.0904
PEDF levels	GCST90085766	rs7419834	A	G	0.158708	0.0339937	3.03027e-06	400	0.0516772	21.6883	0.116169	26.0904
PON 1 levels	GCST90085767	rs3917532	A	T	-0.101901	0.0185405	3.88227e-08	400	0.0702159	30.0564	0.334333	32.8976
PON 1 levels	GCST90085767	rs4240452	G	A	-0.0707305	0.0152696	3.61966e-06	400	0.0509101	21.3491	0.334333	32.8976
PON 1 levels	GCST90085767	rs535242	T	C	0.148211	0.0319074	3.40026e-06	400	0.0511801	21.4684	0.334333	32.8976
PON 1 levels	GCST90085767	rs62362803	C	A	0.10586	0.0227853	3.38424e-06	400	0.0512005	21.4774	0.334333	32.8976
PON 1 levels	GCST90085767	rs62459971	T	C	0.10267	0.0221987	3.74493e-06	400	0.0507632	21.2842	0.334333	32.8976
PON 1 levels	GCST90085767	rs854572	C	G	0.0858794	0.0169865	4.2869e-07	400	0.0600635	25.4329	0.334333	32.8976
Progranulin levels	GCST90085768	rs629301	G	T	-0.34102	0.0348026	1.1405e-22	400	0.193572	95.5343	0.303092	57.408
Progranulin levels	GCST90085768	rs7042766	C	T	-0.137105	0.0293237	2.93164e-06	400	0.0518199	21.7515	0.303092	57.408
Progranulin levels	GCST90085768	rs7202666	T	C	0.152623	0.0308386	7.45688e-07	400	0.0577001	24.3708	0.303092	57.408
PSP94 levels	GCST90085769	rs10993994	A	G	-0.166203	0.0119573	6.35574e-44	400	0.325695	192.237	0.43726	102.566
PSP94 levels	GCST90085769	rs345791	C	T	-0.229397	0.0455135	4.65028e-07	400	0.0597167	25.2767	0.43726	102.566
PSP94 levels	GCST90085769	rs758337	A	G	-0.205305	0.0438977	2.91257e-06	400	0.051848	21.7639	0.43726	102.566
RANTES levels	GCST90085770	rs3821851	C	T	-0.0880783	0.0184781	1.87327e-06	400	0.053749	22.6072	0.164965	26.0772
RANTES levels	GCST90085770	rs4796128	G	A	0.131982	0.0261467	4.47047e-07	400	0.0598848	25.3524	0.164965	26.0772
RANTES levels	GCST90085770	rs4853657	C	T	0.0974884	0.0209551	3.28314e-06	400	0.0513314	21.5353	0.164965	26.0772
SAA levels	GCST90085771	rs10832912	C	G	0.47513	0.0744858	1.78475e-10	400	0.0923307	40.4857	0.467518	42.9121
SAA levels	GCST90085771	rs112702253	G	A	-0.762052	0.161137	2.25379e-06	400	0.0529531	22.2537	0.467518	42.9121
SAA levels	GCST90085771	rs114640010	A	G	-0.720375	0.139589	2.46046e-07	400	0.0624253	26.4995	0.467518	42.9121
SAA levels	GCST90085771	rs11789109	C	T	0.623716	0.135326	4.0466e-06	400	0.0504285	21.1364	0.467518	42.9121
SAA levels	GCST90085771	rs13093968	G	A	-0.255533	0.0533902	1.70019e-06	400	0.0541659	22.7926	0.467518	42.9121
SAA levels	GCST90085771	rs164764	T	G	-0.391207	0.0843497	3.51939e-06	400	0.0510314	21.4027	0.467518	42.9121
SAA levels	GCST90085771	rs3133769	G	A	-0.654258	0.138289	2.23326e-06	400	0.0529925	22.2712	0.467518	42.9121
SAA levels	GCST90085771	rs822168	C	T	-0.846554	0.18223	3.39231e-06	400	0.0511902	21.4729	0.467518	42.9121
SHBG levels	GCST90085772	rs10788530	A	G	0.139492	0.0300052	3.33675e-06	400	0.0512615	21.5044	0.37036	32.9398
SHBG levels	GCST90085772	rs10833431	G	A	0.172563	0.0373298	3.78874e-06	400	0.050713	21.262	0.37036	32.9398
SHBG levels	GCST90085772	rs12940684	C	T	0.172642	0.0374574	4.04542e-06	400	0.0504298	21.137	0.37036	32.9398
SHBG levels	GCST90085772	rs38121	T	C	0.167091	0.0343112	1.11679e-06	400	0.0559703	23.5969	0.37036	32.9398
SHBG levels	GCST90085772	rs4148371	G	A	-0.171837	0.0364308	2.39562e-06	400	0.0526902	22.1371	0.37036	32.9398
SHBG levels	GCST90085772	rs6589535	A	G	0.188892	0.0391975	1.44293e-06	400	0.0548708	23.1065	0.37036	32.9398
SHBG levels	GCST90085772	rs9833191	C	T	-0.147839	0.0308112	1.60081e-06	400	0.0544248	22.9078	0.37036	32.9398
SP D levels	GCST90085773	rs12514503	G	A	0.174113	0.0377969	4.09445e-06	400	0.0503777	21.114	0.493817	47.681
SP D levels	GCST90085773	rs192187739	A	G	0.409571	0.0853411	1.59283e-06	400	0.0544462	22.9174	0.493817	47.681
SP D levels	GCST90085773	rs285439	C	T	0.289254	0.0607356	1.91193e-06	400	0.0536611	22.5682	0.493817	47.681
SP D levels	GCST90085773	rs59092106	C	T	-0.242646	0.0432957	2.08989e-08	400	0.072806	31.2521	0.493817	47.681
SP D levels	GCST90085773	rs61860415	T	C	0.412147	0.0603485	8.52414e-12	400	0.104427	46.4082	0.493817	47.681
SP D levels	GCST90085773	rs7799004	C	T	-0.219565	0.0465927	2.44769e-06	400	0.0525976	22.096	0.493817	47.681
SP D levels	GCST90085773	rs78351904	T	C	0.401564	0.0846603	2.10336e-06	400	0.0532505	22.3857	0.493817	47.681
SP D levels	GCST90085773	rs9301355	C	T	-0.344123	0.0732798	2.65286e-06	400	0.0522507	21.9423	0.493817	47.681
ST2 levels	GCST90085774	rs112130046	G	C	0.180765	0.038336	2.41367e-06	400	0.0526579	22.1228	0.326188	47.8042
ST2 levels	GCST90085774	rs11676124	T	C	0.194003	0.0221281	1.83057e-18	400	0.161188	76.4806	0.326188	47.8042
ST2 levels	GCST90085774	rs72785952	G	T	0.230969	0.0454098	3.65086e-07	400	0.0607476	25.7413	0.326188	47.8042
ST2 levels	GCST90085774	rs7293154	C	T	-0.133111	0.0285352	3.08911e-06	400	0.0515942	21.6516	0.326188	47.8042
TAFI levels	GCST90085775	rs414439	T	A	0.0885125	0.0191876	3.96882e-06	400	0.0505124	21.1734	0.218797	36.9702
TAFI levels	GCST90085775	rs661384	G	T	-0.0463585	0.00998779	3.45871e-06	400	0.0511065	21.4359	0.218797	36.9702
TAFI levels	GCST90085775	rs9534309	C	G	-0.0472337	0.00648239	3.18205e-13	400	0.117178	52.827	0.218797	36.9702
TARC levels	GCST90085776	rs10749105	C	T	0.181987	0.0394367	3.9374e-06	400	0.0505467	21.1886	0.101197	22.3493
TARC levels	GCST90085776	rs3102476	G	A	0.402864	0.087207	3.84423e-06	400	0.0506502	21.2343	0.101197	22.3493
TATI levels	GCST90085777	rs11059627	G	C	-0.151968	0.031204	1.11517e-06	400	0.0559766	23.5997	0.343515	34.2738
TATI levels	GCST90085777	rs1191232	A	G	-0.099705	0.0208328	1.70173e-06	400	0.054162	22.7909	0.343515	34.2738
TATI levels	GCST90085777	rs145431788	C	T	-0.245119	0.051454	1.89934e-06	400	0.0536895	22.5808	0.343515	34.2738
TATI levels	GCST90085777	rs2082391	C	T	0.0965323	0.0166102	6.18651e-09	400	0.0778632	33.6062	0.343515	34.2738
TATI levels	GCST90085777	rs58071488	C	A	-0.251401	0.0540196	3.2573e-06	400	0.0513655	21.5504	0.343515	34.2738
TATI levels	GCST90085777	rs7795502	T	G	0.116152	0.0251935	4.01914e-06	400	0.0504579	21.1494	0.343515	34.2738
TECK levels	GCST90085778	rs11011690	C	T	-0.181208	0.0342613	1.22988e-07	400	0.0653627	27.8336	0.629632	95.2011
TECK levels	GCST90085778	rs2032887	A	G	-0.444447	0.0335278	4.16199e-40	400	0.305222	174.844	0.629632	95.2011
TECK levels	GCST90085778	rs3811757	C	T	0.264065	0.0575759	4.50991e-06	400	0.04996	20.9297	0.629632	95.2011
TECK levels	GCST90085778	rs4898725	C	T	0.259764	0.0557296	3.14447e-06	400	0.0515176	21.6177	0.629632	95.2011
TECK levels	GCST90085778	rs6955223	C	A	-0.28473	0.0613942	3.52247e-06	400	0.0510276	21.401	0.629632	95.2011
TECK levels	GCST90085778	rs7681845	C	T	-0.295916	0.062733	2.39271e-06	400	0.0526955	22.1395	0.629632	95.2011
TECK levels	GCST90085778	rs929716	T	C	-0.217201	0.0455229	1.8309e-06	400	0.0538474	22.651	0.629632	95.2011
Tetranectin levels	GCST90085779	rs59751551	C	T	-0.0720033	0.0155984	3.91075e-06	400	0.0505761	21.2016	0.478845	72.4027
Tetranectin levels	GCST90085779	rs6518034	C	A	-0.0695218	0.0147966	2.62072e-06	400	0.0523033	21.9656	0.478845	72.4027
Tetranectin levels	GCST90085779	rs7198215	C	T	-0.0572604	0.0124221	4.03532e-06	400	0.0504406	21.1418	0.478845	72.4027
Tetranectin levels	GCST90085779	rs8318	G	A	0.0698246	0.00567649	8.98217e-35	400	0.274451	150.55	0.478845	72.4027
Tetranectin levels	GCST90085779	rs844905	G	C	0.0681944	0.0146971	3.48433e-06	400	0.0510746	21.4218	0.478845	72.4027
TFR1 levels	GCST90085780	rs11699231	T	C	0.182988	0.0377605	1.25959e-06	400	0.0554542	23.3665	0.451399	64.838
TFR1 levels	GCST90085780	rs294978	C	T	-0.0859181	0.0177741	1.33882e-06	400	0.0551924	23.2498	0.451399	64.838
TFR1 levels	GCST90085780	rs639218	G	A	0.0850887	0.0176962	1.52205e-06	400	0.0546416	23.0043	0.451399	64.838
TFR1 levels	GCST90085780	rs67908756	T	G	0.165761	0.0149574	1.53127e-28	400	0.23491	122.2	0.451399	64.838
TFR1 levels	GCST90085780	rs72741497	A	G	0.0868454	0.0186925	3.38414e-06	400	0.0512006	21.4775	0.451399	64.838
THP levels	GCST90085781	rs112903628	G	A	0.229669	0.0463593	7.26632e-07	400	0.0578108	24.4205	0.353047	53.8885
THP levels	GCST90085781	rs13335818	C	T	0.251537	0.0274176	4.54555e-20	400	0.17384	83.7468	0.353047	53.8885
THP levels	GCST90085781	rs4749923	C	G	-0.240674	0.0482429	6.07574e-07	400	0.0585756	24.7636	0.353047	53.8885
THP levels	GCST90085781	rs73004818	G	A	0.191822	0.037045	2.24175e-07	400	0.0628205	26.6785	0.353047	53.8885
TIE 2 levels	GCST90085782	rs10749732	G	A	-0.136431	0.0285691	1.79273e-06	400	0.053938	22.6912	0.517764	46.5259
TIE 2 levels	GCST90085782	rs10872829	T	C	0.108658	0.022278	1.07516e-06	400	0.0561332	23.6697	0.517764	46.5259
TIE 2 levels	GCST90085782	rs11200510	C	T	0.16986	0.0365118	3.28414e-06	400	0.05133	21.5347	0.517764	46.5259
TIE 2 levels	GCST90085782	rs118155010	T	A	-0.274984	0.0516133	9.94245e-08	400	0.0662608	28.2432	0.517764	46.5259
TIE 2 levels	GCST90085782	rs2280016	T	C	0.209267	0.0437731	1.74672e-06	400	0.0540498	22.741	0.517764	46.5259
TIE 2 levels	GCST90085782	rs77693339	T	C	-0.181569	0.0389648	3.16507e-06	400	0.0514894	21.6052	0.517764	46.5259
TIE 2 levels	GCST90085782	rs78427201	A	G	0.235947	0.0457098	2.44512e-07	400	0.0624519	26.5115	0.517764	46.5259
TIE 2 levels	GCST90085782	rs78850729	G	T	0.257081	0.0535055	1.54938e-06	400	0.0545651	22.9703	0.517764	46.5259
TIE 2 levels	GCST90085782	rs969242	T	C	-0.351448	0.0652898	7.32958e-08	400	0.067546	28.8307	0.517764	46.5259
TIMP 3 levels	GCST90085783	rs112199808	C	A	-0.313522	0.0657985	1.88972e-06	400	0.0537114	22.5905	0.274868	50.0358
TIMP 3 levels	GCST90085783	rs2286534	T	A	0.215358	0.0470135	4.63289e-06	400	0.0498437	20.8784	0.274868	50.0358
TIMP 3 levels	GCST90085783	rs929015	A	G	0.157589	0.0173299	9.59328e-20	400	0.171313	82.2776	0.274868	50.0358
TN X levels	GCST90085784	rs1034053	T	C	-0.212348	0.0445865	1.91106e-06	400	0.0536631	22.569	0.495812	77.4909
TN X levels	GCST90085784	rs2856448	A	G	0.0111292	0.000889035	5.92975e-36	400	0.28149	155.924	0.495812	77.4909
TN X levels	GCST90085784	rs6963843	A	G	0.193687	0.0393436	8.52406e-07	400	0.0571278	24.1145	0.495812	77.4909
TN X levels	GCST90085784	rs72842101	C	T	0.344346	0.0731027	2.47182e-06	400	0.0525553	22.0773	0.495812	77.4909
TN X levels	GCST90085784	rs7524648	A	T	0.351524	0.0758371	3.56501e-06	400	0.0509758	21.3781	0.495812	77.4909
TRAIL R3 levels	GCST90085785	rs11747436	T	C	-0.226317	0.0492404	4.3032e-06	400	0.0501628	21.0192	0.256054	33.9881
TRAIL R3 levels	GCST90085785	rs4760	A	G	0.288074	0.0417755	5.357e-12	400	0.106249	47.314	0.256054	33.9881
TRAIL R3 levels	GCST90085785	rs481940	T	C	0.156173	0.034058	4.52889e-06	400	0.0499419	20.9217	0.256054	33.9881
TRAIL R3 levels	GCST90085785	rs6703172	G	C	0.171275	0.0374467	4.78883e-06	400	0.0497005	20.8153	0.256054	33.9881
Vaspin levels	GCST90085786	rs17063854	G	A	-0.650262	0.13862	2.719e-06	400	0.0521446	21.8953	0.416177	56.1723
Vaspin levels	GCST90085786	rs1851580	G	T	-0.37906	0.0775762	1.02755e-06	400	0.0563274	23.7564	0.416177	56.1723
Vaspin levels	GCST90085786	rs4905214	G	A	-0.630312	0.0817871	1.29074e-14	400	0.129287	59.0968	0.416177	56.1723
Vaspin levels	GCST90085786	rs6832693	A	G	-0.66443	0.144107	4.01365e-06	400	0.0504639	21.152	0.416177	56.1723
Vaspin levels	GCST90085786	rs8006968	T	A	-0.769337	0.100422	1.84469e-14	400	0.127954	58.3977	0.416177	56.1723
VDBP levels	GCST90085787	rs1399918	A	G	0.115943	0.0253802	4.91761e-06	400	0.0495858	20.7648	0.540764	116.281
VDBP levels	GCST90085787	rs17288261	T	C	0.203119	0.039523	2.75831e-07	400	0.06194	26.2799	0.540764	116.281
VDBP levels	GCST90085787	rs7041	A	C	-0.231288	0.0148493	1.06565e-54	400	0.37753	241.388	0.540764	116.281
VDBP levels	GCST90085787	rs77490356	A	G	0.337797	0.0723293	3.00816e-06	400	0.0517088	21.7023	0.540764	116.281
VEGF levels	GCST90085788	rs13206436	G	A	0.268037	0.0283766	3.52947e-21	400	0.182375	88.7756	0.236251	61.4021
VEGF levels	GCST90085788	rs17827507	T	C	0.119477	0.0250339	1.81876e-06	400	0.053876	22.6637	0.236251	61.4021
VEGFR 2 levels	GCST90085789	rs10963158	C	A	-0.0941862	0.0183638	2.91418e-07	400	0.0617063	26.1742	0.341818	34.0166
VEGFR 2 levels	GCST90085789	rs11728190	C	T	-0.0503785	0.010298	9.97874e-07	400	0.0564529	23.8126	0.341818	34.0166
VEGFR 2 levels	GCST90085789	rs2669274	A	T	0.138923	0.0261114	1.03545e-07	400	0.0660895	28.165	0.341818	34.0166
VEGFR 2 levels	GCST90085789	rs72788643	C	T	0.160361	0.0349102	4.35808e-06	400	0.0501081	20.995	0.341818	34.0166
VEGFR 2 levels	GCST90085789	rs73101751	T	G	0.114162	0.0249509	4.75172e-06	400	0.0497342	20.8302	0.341818	34.0166
VEGFR 2 levels	GCST90085789	rs7666247	G	C	-0.0744187	0.0150332	7.40988e-07	400	0.0577271	24.383	0.341818	34.0166
VEGFR 3 levels	GCST90085790	rs10804683	G	A	0.261298	0.0335831	7.21591e-15	400	0.131451	60.2357	0.542999	58.0723
VEGFR 3 levels	GCST90085790	rs11083985	T	C	0.16266	0.033167	9.37702e-07	400	0.0567194	23.9317	0.542999	58.0723
VEGFR 3 levels	GCST90085790	rs11844589	A	G	0.307662	0.0614461	5.5281e-07	400	0.0589789	24.9448	0.542999	58.0723
VEGFR 3 levels	GCST90085790	rs156073	T	A	-0.248136	0.0510124	1.1491e-06	400	0.055848	23.5423	0.542999	58.0723
VEGFR 3 levels	GCST90085790	rs16843666	C	T	0.337289	0.067706	6.30364e-07	400	0.0584183	24.693	0.542999	58.0723
VEGFR 3 levels	GCST90085790	rs16976690	C	G	0.410796	0.0819871	5.42908e-07	400	0.0590561	24.9795	0.542999	58.0723
VEGFR 3 levels	GCST90085790	rs195870	C	T	-0.233539	0.0471766	7.40956e-07	400	0.0577273	24.383	0.542999	58.0723
VEGFR 3 levels	GCST90085790	rs6726952	T	C	-0.208627	0.0396282	1.40496e-07	400	0.0648	27.5774	0.542999	58.0723
YKL 40 levels	GCST90085791	rs13238761	G	C	0.153206	0.0329811	3.39633e-06	400	0.0511851	21.4706	0.294375	32.8741
YKL 40 levels	GCST90085791	rs4129605	C	T	0.137234	0.0299273	4.52692e-06	400	0.0499437	20.9226	0.294375	32.8741
YKL 40 levels	GCST90085791	rs4950931	G	A	-0.205745	0.0345558	2.61699e-09	400	0.0814098	35.2726	0.294375	32.8741
YKL 40 levels	GCST90085791	rs7671416	C	T	0.1104	0.0236667	3.08943e-06	400	0.0515938	21.6514	0.294375	32.8741
YKL 40 levels	GCST90085791	rs77016024	C	T	-0.259907	0.0513266	4.11016e-07	400	0.0602429	25.5137	0.294375	32.8741
Angiogenin levels conditional to rs11629118	GCST90085792	rs1693233	C	T	-0.114679	0.024676	3.36176e-06	400	0.0512292	21.4902	0.102362	22.6358
Angiogenin levels conditional to rs11629118	GCST90085792	rs2445859	T	C	0.143037	0.0308086	3.43806e-06	400	0.0511324	21.4473	0.102362	22.6358
Apo E levels conditional to rs429358	GCST90085793	rs584007	A	G	-0.1415	0.0279661	4.19933e-07	400	0.0601515	25.4725	0.113191	25.3363
Apo E levels conditional to rs429358	GCST90085793	rs7567690	T	C	0.243975	0.0515442	2.20886e-06	400	0.0530398	22.2922	0.113191	25.3363
CA 15 3 levels conditional to rs2070803	GCST90085794	rs1997399	T	C	-0.148446	0.0308508	1.49637e-06	400	0.0547146	23.0369	0.347283	34.8497
CA 15 3 levels conditional to rs2070803	GCST90085794	rs2247946	T	C	0.2256	0.0482264	2.89775e-06	400	0.0518701	21.7737	0.347283	34.8497
CA 15 3 levels conditional to rs2070803	GCST90085794	rs3863313	T	G	-0.132601	0.0287712	4.04994e-06	400	0.050425	21.1349	0.347283	34.8497
CA 15 3 levels conditional to rs2070803	GCST90085794	rs62392404	G	A	0.132201	0.0288237	4.50683e-06	400	0.049963	20.931	0.347283	34.8497
CA 15 3 levels conditional to rs2070803	GCST90085794	rs75165412	T	C	0.311021	0.0672622	3.76393e-06	400	0.0507413	21.2746	0.347283	34.8497
CA 15 3 levels conditional to rs2070803	GCST90085794	rs760077	T	A	-0.173573	0.0276692	3.53862e-10	400	0.0895686	39.1554	0.347283	34.8497
CFHR1 levels conditional to rs60642321	GCST90085795	rs10994740	T	C	0.0943847	0.0193726	1.10439e-06	400	0.0560182	23.6183	0.345879	34.6343
CFHR1 levels conditional to rs60642321	GCST90085795	rs112690481	A	T	0.220954	0.043197	3.13684e-07	400	0.0613933	26.0328	0.345879	34.6343
CFHR1 levels conditional to rs60642321	GCST90085795	rs12047098	T	C	0.111103	0.0197998	2.00783e-08	400	0.0729732	31.3295	0.345879	34.6343
CFHR1 levels conditional to rs60642321	GCST90085795	rs150814238	C	T	0.184316	0.0391407	2.4887e-06	400	0.052526	22.0643	0.345879	34.6343
CFHR1 levels conditional to rs60642321	GCST90085795	rs17188431	A	G	-0.136681	0.0291373	2.71994e-06	400	0.0521431	21.8946	0.345879	34.6343
CFHR1 levels conditional to rs60642321	GCST90085795	rs55902602	C	T	0.128922	0.0278569	3.69189e-06	400	0.0508248	21.3114	0.345879	34.6343
DBH levels conditional to rs2519143	GCST90085796	rs1568340	C	T	0.211305	0.0414327	3.39707e-07	400	0.0610542	25.8796	0.275185	29.9174
DBH levels conditional to rs2519143	GCST90085796	rs4024017	A	G	-0.269435	0.0554187	1.16317e-06	400	0.0557959	23.519	0.275185	29.9174
DBH levels conditional to rs2519143	GCST90085796	rs7628066	G	A	-0.234168	0.0490487	1.80424e-06	400	0.0539105	22.679	0.275185	29.9174
DBH levels conditional to rs2519143	GCST90085796	rs7832670	A	G	0.4245	0.0913237	3.3467e-06	400	0.0512486	21.4987	0.275185	29.9174
DBH levels conditional to rs2519143	GCST90085796	rs7857468	C	A	-0.257339	0.0542942	2.14009e-06	400	0.053176	22.3527	0.275185	29.9174
E Cad levelsrs492602	GCST90085797	rs12478822	C	G	0.114112	0.0235397	1.24934e-06	400	0.0554893	23.3822	0.289634	32.1287
E Cad levelsrs492602	GCST90085797	rs34354446	G	A	-0.145854	0.029857	1.03387e-06	400	0.0563011	23.7447	0.289634	32.1287
E Cad levelsrs492602	GCST90085797	rs4294998	A	C	-0.107523	0.0225542	1.86707e-06	400	0.0537633	22.6136	0.289634	32.1287
E Cad levelsrs492602	GCST90085797	rs635634	T	C	-0.0740036	0.0130879	1.5645e-08	400	0.074013	31.8117	0.289634	32.1287
E Cad levelsrs492602	GCST90085797	rs7608448	T	C	-0.106884	0.0232783	4.39951e-06	400	0.0500672	20.977	0.289634	32.1287
Eotaxin 2 levels conditional to rs7799486	GCST90085798	rs10758550	A	C	0.166674	0.0348252	1.70118e-06	400	0.0541634	22.7915	0.352105	42.8247
Eotaxin 2 levels conditional to rs7799486	GCST90085798	rs17660641	G	A	0.145947	0.0307258	2.03422e-06	400	0.0533944	22.4496	0.352105	42.8247
Eotaxin 2 levels conditional to rs7799486	GCST90085798	rs42773	T	C	-0.182417	0.0374631	1.12019e-06	400	0.0559573	23.5911	0.352105	42.8247
Eotaxin 2 levels conditional to rs7799486	GCST90085798	rs6467885	T	C	0.447875	0.0565464	2.36572e-15	400	0.135573	62.4205	0.352105	42.8247
Eotaxin 2 levels conditional to rs7799486	GCST90085798	rs72962839	T	A	-0.323542	0.0683696	2.22045e-06	400	0.0530173	22.2822	0.352105	42.8247
Haptoglobin levels conditional to rs3213423	GCST90085799	rs10034337	G	A	-0.202002	0.0438252	4.04107e-06	400	0.0504344	21.139	0.204176	25.3351
Haptoglobin levels conditional to rs3213423	GCST90085799	rs10068106	A	C	-0.146204	0.0316406	3.82311e-06	400	0.050674	21.2448	0.204176	25.3351
Haptoglobin levels conditional to rs3213423	GCST90085799	rs1138803	A	G	0.197269	0.0422021	2.94819e-06	400	0.0517956	21.7407	0.204176	25.3351
Haptoglobin levels conditional to rs3213423	GCST90085799	rs35674999	C	A	0.264952	0.0569863	3.32902e-06	400	0.0512715	21.5088	0.204176	25.3351
IL 2 receptor_alpha levels conditional to rs12722497	GCST90085800	rs12705748	A	C	0.0725267	0.0153075	2.15864e-06	400	0.0531388	22.3362	0.230515	29.5827
IL 2 receptor_alpha levels conditional to rs12722497	GCST90085800	rs2104286	T	C	0.115636	0.0226807	3.4243e-07	400	0.0610203	25.8643	0.230515	29.5827
IL 2 receptor_alpha levels conditional to rs12722497	GCST90085800	rs4302656	A	T	0.102176	0.0209004	1.01512e-06	400	0.0563795	23.7797	0.230515	29.5827
IL 2 receptor_alpha levels conditional to rs12722497	GCST90085800	rs7768018	A	T	-0.132903	0.0263077	4.37503e-07	400	0.0599768	25.3938	0.230515	29.5827
IL 6r levels conditional to rs12126142	GCST90085801	rs13269700	A	G	0.083686	0.0179061	2.95951e-06	400	0.0517791	21.7334	0.446352	39.4031
IL 6r levels conditional to rs12126142	GCST90085801	rs2535759	G	A	0.206433	0.0377305	4.46878e-08	400	0.0696258	29.7849	0.446352	39.4031
IL 6r levels conditional to rs12126142	GCST90085801	rs4300315	C	G	0.111578	0.0239619	3.21643e-06	400	0.0514199	21.5745	0.446352	39.4031
IL 6r levels conditional to rs12126142	GCST90085801	rs4845626	G	T	-0.106001	0.0225089	2.48598e-06	400	0.0525307	22.0664	0.446352	39.4031
IL 6r levels conditional to rs12126142	GCST90085801	rs575376	T	A	0.098673	0.0185177	9.89814e-08	400	0.0662797	28.2518	0.446352	39.4031
IL 6r levels conditional to rs12126142	GCST90085801	rs62496677	A	C	0.0982665	0.0213223	4.05355e-06	400	0.0504211	21.1332	0.446352	39.4031
IL 6r levels conditional to rs12126142	GCST90085801	rs6565873	G	A	-0.183777	0.0382204	1.52185e-06	400	0.0546421	23.0046	0.446352	39.4031
IL 6r levels conditional to rs12126142	GCST90085801	rs79953083	C	T	0.105378	0.0230509	4.84155e-06	400	0.0496532	20.7945	0.446352	39.4031
Kallikrein 5 levels conditional to rs11553092	GCST90085802	rs2497409	T	C	0.132902	0.0290498	4.76266e-06	400	0.0497242	20.8258	0.102715	22.723
Kallikrein 5 levels conditional to rs11553092	GCST90085802	rs3770696	C	T	0.22166	0.0468526	2.23402e-06	400	0.052991	22.2706	0.102715	22.723
Lp a levels conditional to rs4646272	GCST90085803	rs11198973	G	T	-0.497621	0.104349	1.85314e-06	400	0.0537955	22.6279	0.256012	27.1156
Lp a levels conditional to rs4646272	GCST90085803	rs72912001	G	T	-0.760608	0.166037	4.62872e-06	400	0.0498476	20.8802	0.256012	27.1156
Lp a levels conditional to rs4646272	GCST90085803	rs73988396	T	C	0.670564	0.14659	4.77545e-06	400	0.0497126	20.8207	0.256012	27.1156
Lp a levels conditional to rs4646272	GCST90085803	rs7925676	A	T	-0.546271	0.117951	3.63327e-06	400	0.0508939	21.342	0.256012	27.1156
Lp a levels conditional to rs4646272	GCST90085803	rs9968113	T	A	0.467984	0.100151	2.97122e-06	400	0.0517621	21.7259	0.256012	27.1156
MMP 1 levels conditional to rs471994	GCST90085804	rs179163	A	C	0.185358	0.0388479	1.82977e-06	400	0.0538501	22.6521	0.20581	25.5906
MMP 1 levels conditional to rs471994	GCST90085804	rs3758875	A	G	-0.201811	0.043579	3.64047e-06	400	0.0508854	21.3382	0.20581	25.5906
MMP 1 levels conditional to rs471994	GCST90085804	rs4454627	C	T	0.243875	0.0527846	3.83384e-06	400	0.0506619	21.2395	0.20581	25.5906
MMP 1 levels conditional to rs471994	GCST90085804	rs76934913	G	A	0.188369	0.0408767	4.06121e-06	400	0.050413	21.1296	0.20581	25.5906
MMP 7 levels conditional to rs56857975	GCST90085805	rs10976891	G	A	-0.160959	0.0337697	1.87555e-06	400	0.0537438	22.6049	0.371117	33.0468
MMP 7 levels conditional to rs56857975	GCST90085805	rs10984066	A	C	0.174688	0.0368273	2.10117e-06	400	0.053255	22.3877	0.371117	33.0468
MMP 7 levels conditional to rs56857975	GCST90085805	rs12517450	T	C	-0.100497	0.0219028	4.46878e-06	400	0.0499996	20.9472	0.371117	33.0468
MMP 7 levels conditional to rs56857975	GCST90085805	rs233450	A	G	-0.0919066	0.0196581	2.93581e-06	400	0.0518138	21.7488	0.371117	33.0468
MMP 7 levels conditional to rs56857975	GCST90085805	rs2957980	G	A	0.128784	0.0279038	3.92588e-06	400	0.0505594	21.1942	0.371117	33.0468
MMP 7 levels conditional to rs56857975	GCST90085805	rs72795927	G	T	-0.131701	0.0277505	2.07571e-06	400	0.0533074	22.411	0.371117	33.0468
MMP 7 levels conditional to rs56857975	GCST90085805	rs9297945	A	G	0.0807735	0.0162112	6.27436e-07	400	0.0584382	24.7019	0.371117	33.0468
MSP levels conditional to rs11709525	GCST90085806	rs427090	G	A	0.244795	0.0520087	2.5161e-06	400	0.0524788	22.0434	0.208604	26.0295
MSP levels conditional to rs11709525	GCST90085806	rs4422570	C	T	-0.258333	0.0561049	4.13535e-06	400	0.0503348	21.0951	0.208604	26.0295
MSP levels conditional to rs11709525	GCST90085806	rs7129677	A	G	0.158499	0.0342134	3.60965e-06	400	0.0509221	21.3544	0.208604	26.0295
MSP levels conditional to rs11709525	GCST90085806	rs7897746	C	T	-0.230008	0.0477308	1.44382e-06	400	0.0548682	23.1053	0.208604	26.0295
PARC levels conditional to rs854469	GCST90085807	rs10413115	T	C	0.248057	0.0511574	1.24156e-06	400	0.0555161	23.3941	0.160615	25.2579
PARC levels conditional to rs854469	GCST90085807	rs1357365	G	A	-0.131082	0.0274139	1.73923e-06	400	0.0540683	22.7492	0.160615	25.2579
PARC levels conditional to rs854469	GCST90085807	rs6089291	T	C	-0.175083	0.0377508	3.52023e-06	400	0.0510304	21.4023	0.160615	25.2579
PON 1 levels conditional to rs662	GCST90085808	rs4240452	G	A	-0.0798341	0.0166791	1.69742e-06	400	0.0541729	22.7957	0.333556	32.7828
PON 1 levels conditional to rs662	GCST90085808	rs4457388	T	C	0.103255	0.0220304	2.7734e-06	400	0.0520592	21.8574	0.333556	32.7828
PON 1 levels conditional to rs662	GCST90085808	rs535242	T	C	0.142422	0.0307129	3.5315e-06	400	0.0510166	21.3962	0.333556	32.7828
PON 1 levels conditional to rs662	GCST90085808	rs62362804	A	G	0.105451	0.0223167	2.29866e-06	400	0.0528682	22.2161	0.333556	32.7828
PON 1 levels conditional to rs662	GCST90085808	rs62459971	T	C	0.100011	0.0212251	2.45393e-06	400	0.0525866	22.0912	0.333556	32.7828
PON 1 levels conditional to rs662	GCST90085808	rs854572	C	G	0.0896113	0.0162255	3.33497e-08	400	0.0708525	30.3496	0.333556	32.7828
SP D levels conditional to rs7072378	GCST90085809	rs10887332	A	C	-0.194124	0.035457	4.37684e-08	400	0.0697131	29.825	0.178463	28.6744
SP D levels conditional to rs7072378	GCST90085809	rs7236743	G	T	0.39253	0.0791146	6.99375e-07	400	0.0579743	24.4938	0.178463	28.6744
SP D levels conditional to rs7072378	GCST90085809	rs78351904	T	C	0.367065	0.0793543	3.73421e-06	400	0.0507756	21.2897	0.178463	28.6744
ST2 levels conditional to rs11676124	GCST90085810	rs272508	T	C	-0.144839	0.0316853	4.85012e-06	400	0.0496455	20.7911	0.311763	29.6707
ST2 levels conditional to rs11676124	GCST90085810	rs6543124	T	A	-0.114958	0.0244529	2.58628e-06	400	0.0523603	21.9908	0.311763	29.6707
ST2 levels conditional to rs11676124	GCST90085810	rs6695085	G	A	0.238939	0.0519412	4.22135e-06	400	0.0502458	21.0558	0.311763	29.6707
ST2 levels conditional to rs11676124	GCST90085810	rs67493603	A	G	-0.154952	0.0331231	2.89589e-06	400	0.0518728	21.7749	0.311763	29.6707
ST2 levels conditional to rs11676124	GCST90085810	rs77583087	T	G	-0.20431	0.0412186	7.16884e-07	400	0.0578685	24.4464	0.311763	29.6707
ST2 levels conditional to rs11676124	GCST90085810	rs8085002	C	T	0.223749	0.0488832	4.71218e-06	400	0.0497703	20.8461	0.311763	29.6707
THP levels conditional to rs9928003	GCST90085811	rs10820881	T	A	0.104471	0.0216155	1.34385e-06	400	0.0551763	23.2426	0.326497	31.7528
THP levels conditional to rs9928003	GCST90085811	rs112903628	G	A	0.21902	0.0475401	4.0843e-06	400	0.0503885	21.1187	0.326497	31.7528
THP levels conditional to rs9928003	GCST90085811	rs12803936	C	T	0.0820641	0.017313	2.13704e-06	400	0.0531821	22.3554	0.326497	31.7528
THP levels conditional to rs9928003	GCST90085811	rs4749923	C	G	-0.248129	0.0492605	4.72689e-07	400	0.059647	25.2453	0.326497	31.7528
THP levels conditional to rs9928003	GCST90085811	rs7304351	T	C	0.262857	0.0549791	1.74398e-06	400	0.0540566	22.744	0.326497	31.7528
THP levels conditional to rs9928003	GCST90085811	rs9418490	G	A	0.225724	0.0472169	1.74789e-06	400	0.0540469	22.7397	0.326497	31.7528
TIMP 3 levels conditional to rs4821097	GCST90085812	rs12492213	A	G	0.163659	0.0357205	4.61292e-06	400	0.0498624	20.8867	0.158917	24.9406
TIMP 3 levels conditional to rs4821097	GCST90085812	rs6560786	T	C	0.135993	0.0295007	4.0302e-06	400	0.0504461	21.1442	0.158917	24.9406
TIMP 3 levels conditional to rs4821097	GCST90085812	rs916396	G	C	0.2189	0.0438651	6.02866e-07	400	0.0586088	24.7785	0.158917	24.9406
TN X levels conditional to rs2856448	GCST90085813	rs11909540	C	G	0.110222	0.0236138	3.04604e-06	400	0.0516548	21.6784	0.206522	34.3561
TN X levels conditional to rs2856448	GCST90085813	rs55711615	T	G	-0.114252	0.0247905	4.05207e-06	400	0.0504227	21.1339	0.206522	34.3561
TN X levels conditional to rs2856448	GCST90085813	rs9469077	A	G	-0.14156	0.0207259	8.48679e-12	400	0.104444	46.4167	0.206522	34.3561
Vaspin levels conditional to rs12434602	GCST90085814	rs10741559	A	G	-0.354676	0.0750739	2.30837e-06	400	0.0528501	22.208	0.681431	75.4496
Vaspin levels conditional to rs12434602	GCST90085814	rs12664798	T	C	-0.49736	0.103412	1.51304e-06	400	0.0546671	23.0157	0.681431	75.4496
Vaspin levels conditional to rs12434602	GCST90085814	rs17063854	G	A	-0.584661	0.125535	3.20287e-06	400	0.0514382	21.5826	0.681431	75.4496
Vaspin levels conditional to rs12434602	GCST90085814	rs2296235	A	T	-0.440633	0.0936225	2.5202e-06	400	0.0524718	22.0403	0.681431	75.4496
Vaspin levels conditional to rs12434602	GCST90085814	rs34339529	G	A	-0.481703	0.103662	3.37043e-06	400	0.0512181	21.4852	0.681431	75.4496
Vaspin levels conditional to rs12434602	GCST90085814	rs5749602	C	T	-0.497476	0.0954464	1.8671e-07	400	0.063596	27.0302	0.681431	75.4496
Vaspin levels conditional to rs12434602	GCST90085814	rs74704150	T	C	-0.691304	0.151364	4.94335e-06	400	0.0495632	20.7548	0.681431	75.4496
Vaspin levels conditional to rs12434602	GCST90085814	rs7912498	G	A	-0.367295	0.0784792	2.86658e-06	400	0.0519167	21.7943	0.681431	75.4496
Vaspin levels conditional to rs12434602	GCST90085814	rs79759249	G	T	-0.431322	0.0902379	1.75444e-06	400	0.0540308	22.7325	0.681431	75.4496
Vaspin levels conditional to rs12434602	GCST90085814	rs8006968	T	A	-0.800862	0.101604	3.21742e-15	400	0.13444	61.818	0.681431	75.4496
Vaspin levels conditional to rs12434602	GCST90085814	rs9380836	A	G	-0.372044	0.0704144	1.26652e-07	400	0.0652386	27.7771	0.681431	75.4496

## Sheet: Table S3
Table S3:Association of primary immunodeficiency-related genes with varicella-zoster virus reactivation syndrome using Mendelian randomization (validation dataset, P < 5 × 10-6 for SNPs).
Exposure	Outcome	MR Method	Nsnp	Beta	SE	Pval	OR	LL	UL	MR Egger Intercept	Intercept SE	Intercept P	Q	Q_df	Q_pval	Causal Estimate	sd	T-stat	P-value	MR-PRESSO global_test_RSSobs*	MR-PRESSO global_test_Pvalue*	MR-PRESSO results_Distortion Test_Distortion Coefficient	MR-PRESSO results_Distortion Test_Pvalue
cathepsin D	Herpes Zoster	MR Egger	4	-1.02862	1.55828	0.577044	0.357498	0.0168592	7.58075	0.0534447	0.128297	0.717443	0.51533	2	0.772854
		Weighted median	4	-0.278508	0.241071	0.247969	0.756912	0.471891	1.21409
		Inverse variance weighted	4	-0.384631	0.195788	0.0494684	0.680701	0.463766	0.999113				0.688862	3	0.875821
		MR-PRESSO														-0.384632	0.0938191	-4.09971	0.0262552	1.47867	0.844
IGFBP-2	Herpes Zoster	MR Egger	6	-0.223619	0.401629	0.607358	0.799619	0.363923	1.75694	0.0793833	0.0741126	0.344443	1.44417	4	0.836482
		Weighted median	6	0.132199	0.121916	0.278211	1.14134	0.898745	1.44941
		Inverse variance weighted	6	0.194825	0.0932158	0.0366138	1.2151	1.0122	1.45867				2.59146	5	0.762662
		MR-PRESSO														0.194825	0.0671085	2.90314	0.0336674	4.20173	0.723
IL-18	Herpes Zoster	Inverse variance weighted	2	-0.379013	0.190265	0.0463681	0.684537	0.471455	0.993925				0.954403	1	0.328601
omentin	Herpes Zoster	MR Egger	5	0.470015	0.188791	0.0885146	1.60002	1.10515	2.31647	-0.0491811	0.0292952	0.191782	1.42038	3	0.700765
		Weighted median	5	0.223986	0.119822	0.0615784	1.25105	0.989193	1.58223
		Inverse variance weighted	5	0.19685	0.098557	0.0457898	1.21756	1.00369	1.47701				4.23878	4	0.374654
		MR-PRESSO														0.19685	0.098557	1.99733	0.116472	4.97514	0.549
TECK	Herpes Zoster	MR Egger	7	0.236529	0.195469	0.280337	1.26684	0.863648	1.85827	-0.0389549	0.0579608	0.531327	3.00423	5	0.699334
		Weighted median	7	0.113413	0.0691908	0.101184	1.12009	0.978044	1.28278
		Inverse variance weighted	7	0.110175	0.0535112	0.0395031	1.11647	1.00531	1.23993				3.45593	6	0.749823
		MR-PRESSO														0.110175	0.0406118	2.71287	0.0349722	5.08409	0.727
THP	Herpes Zoster	MR Egger	4	0.374991	0.284001	0.317557	1.45498	0.833892	2.53865	-0.0244634	0.0553626	0.701765	1.8945	2	0.387807
		Weighted median	4	0.223314	0.162997	0.170671	1.25021	0.908319	1.7208
		Inverse variance weighted	4	0.260571	0.116645	0.025491	1.29767	1.03246	1.631				2.08975	3	0.553989
Ficolin-3	Postherpetic Neuralgia	MR Egger	3	1.5259	2.0079	0.586302	4.59927	0.0898519	235.423	-0.0122902	0.202679	0.961443	0.157156	1	0.691789
		Weighted median	3	1.50137	0.746862	0.0444063	4.48782	1.03823	19.3989
		Inverse variance weighted	3	1.40979	0.604288	0.0196497	4.09508	1.2528	13.3857				0.160833	2	0.922732
IL -2 receptor α	Postherpetic Neuralgia	MR Egger	3	0.252008	0.765338	0.797494	1.28661	0.287063	5.76653	0.0859108	0.103723	0.559621	0.0141327	1	0.905369
		Weighted median	3	0.78013	0.43853	0.0752458	2.18175	0.923679	5.15336
		Inverse variance weighted	3	0.791266	0.402319	0.0492108	2.20619	1.00272	4.85404				0.700171	2	0.704628
THP	Postherpetic Neuralgia	Inverse variance weighted	2	0.681347	0.341579	0.0460759	1.97654	1.01192	3.86068				0.00168453	1	0.967262
PON-1	Postherpetic Neuralgia	MR Egger	5	4.46162	3.71255	0.31567	86.6277	0.059906	125269	-0.341862	0.37889	0.433416	4.56574	3	0.2065
		Weighted median	5	0.92849	0.724752	0.200153	2.53069	0.611388	10.4751
		Inverse variance weighted	5	1.15533	0.58199	0.0471286	3.17508	1.01474	9.93471				5.80473	4	0.214214
		MR-PRESSO														0.620141	0.533223	1.16301	0.328928	5.01451	0.478
CD40	Stroke	MR Egger	6	0.148761	0.229718	0.552549	1.1604	0.739717	1.82031	0.000257263	0.0258541	0.992537	0.110119	4	0.998539
		Weighted median	6	0.155949	0.0869814	0.0729887	1.16877	0.985571	1.38602
		Inverse variance weighted	6	0.15092	0.0754595	0.0454991	1.1629	1.00302	1.34827				0.110218	5	0.999794
		MR-PRESSO														0.15092	0.0112036	13.4707	4.03687e-05	0.185914	0.999
CEACAM1	Stroke	MR Egger	7	-0.0217074	0.224083	0.926591	0.978526	0.63071	1.51815	0.0266174	0.0277949	0.382226	5.72215	5	0.3342
		Weighted median	7	0.126162	0.0917971	0.169332	1.13447	0.947659	1.3581
		Inverse variance weighted	7	0.180591	0.0742328	0.0149843	1.19792	1.03572	1.38554				6.77167	6	0.34248
		MR-PRESSO														0.18059	0.0742328	2.43276	0.0509709	9.43839	0.395
eotaxin-2	Stroke	MR Egger	4	-0.118813	0.217133	0.639148	0.887974	0.580193	1.35903	0.0605952	0.0574577	0.402199	1.95552	2	0.376153
		Weighted median	4	0.0873595	0.0524151	0.0955771	1.09129	0.984743	1.20936
		Inverse variance weighted	4	0.10606	0.0414478	0.0105007	1.11189	1.02513	1.20599				3.06771	3	0.381303
		MR-PRESSO														0.10606	0.0414478	2.55889	0.0832947	5.68007	0.467
fetuin-A	Stroke	MR Egger	5	-0.108366	0.271125	0.716141	0.897299	0.527413	1.52659	0.0343049	0.030476	0.34224	2.25826	3	0.520565
		Weighted median	5	0.0904264	0.118971	0.447212	1.09464	0.866965	1.38211
		Inverse variance weighted	5	0.179003	0.0912911	0.0499038	1.19602	1.00007	1.43037				3.52532	4	0.474039
		MR-PRESSO														0.179003	0.0857033	2.08863	0.104993	5.31522	0.527
MIF	Stroke	Inverse variance weighted	2	-0.213451	0.0917768	0.0200313	0.807792	0.674804	0.966989				0.14883	1	0.699656
haptoglobin	Stroke	MR Egger	4	-0.243644	0.256562	0.442523	0.783766	0.47402	1.29592	0.0288852	0.051192	0.629421	2.1996	2	0.332938
		Weighted median	4	-0.0871434	0.0617746	0.158343	0.916546	0.812027	1.03452
		Inverse variance weighted	4	-0.101609	0.0472939	0.0316767	0.903382	0.823407	0.991126				2.54976	3	0.466366
		MR-PRESSO														-0.101609	0.0436007	-2.33045	0.102106	4.26238	0.55
apoC-I	Cerebral aneurysm	Inverse variance weighted	2	-1.89623	0.942669	0.0442674	0.150134	0.0236627	0.952567				0.570028	1	0.450248
DBH	Cerebral aneurysm	Inverse variance weighted	2	-0.38419	0.143959	0.00761339	0.681002	0.51358	0.903002				0.086682	1	0.768438
progranulin	Cerebral aneurysm	MR Egger	3	0.844115	0.593407	0.390077	2.32592	0.726903	7.44239	-0.0732003	0.128329	0.669991	0.220325	1	0.638793
		Weighted median	3	0.600358	0.255418	0.0187484	1.82277	1.10488	3.0071
		Inverse variance weighted	3	0.534664	0.240453	0.0261773	1.70687	1.06543	2.73451				0.545691	2	0.76121
SP-D	Cerebral aneurysm	MR Egger	8	0.0973838	0.456016	0.837967	1.10228	0.450946	2.6944	-0.116188	0.131692	0.41158	3.45212	6	0.750329
		Weighted median	8	-0.204253	0.182547	0.263179	0.815256	0.570042	1.16595
		Inverse variance weighted	8	-0.28584	0.138853	0.0395352	0.751383	0.572357	0.986406				4.23052	7	0.752877
		MR-PRESSO														-0.28584	0.107945	-2.648	0.0330373	5.12664	0.791
TRAIL-R3	Cerebral aneurysm	MR Egger	3	0.484732	1.11747	0.739443	1.62374	0.181681	14.5118	0.0653322	0.247015	0.835392	0.611588	1	0.434191
		Weighted median	3	0.690763	0.348449	0.0474352	1.99524	1.00783	3.95003
		Inverse variance weighted	3	0.770334	0.287544	0.00738391	2.16049	1.22967	3.7959				0.681541	2	0.711222
IL-6R	Cerebral aneurysm	MR Egger	6	2.16997	1.35725	0.185111	8.75798	0.612479	125.233	-0.157189	0.157591	0.374997	1.54125	4	0.819309
		Weighted median	6	1.07136	0.538924	0.0468167	2.91934	1.01518	8.39509
		Inverse variance weighted	6	0.884525	0.425802	0.0377724	2.42183	1.05122	5.57949				2.53616	5	0.77104
		MR-PRESSO														0.884525	0.303257	2.91675	0.0331386	3.43415	0.804
CEACAM1	Giant Cell Arteritis	MR Egger	7	-1.22779	1.42276	0.427601	0.292939	0.0180178	4.7627	0.0395628	0.17645	0.831463	9.37142	5	0.0951354
		Weighted median	7	-0.788223	0.486466	0.105166	0.454652	0.175223	1.17969
		Inverse variance weighted	7	-0.927019	0.43499	0.0330786	0.395731	0.168706	0.928264				9.46565	6	0.149034
		MR-PRESSO														-0.927019	0.43499	-2.13113	0.0770892	12.4218	0.233
IL-1RI	Giant Cell Arteritis	MR Egger	20	0.178814	0.581057	0.761813	1.1958	0.382871	3.73477	0.0395023	0.0884947	0.660646	12.3458	18	0.828882
		Weighted median	20	0.566715	0.272988	0.0378966	1.76247	1.03217	3.00949
		Inverse variance weighted	20	0.42311	0.19522	0.0302086	1.5267	1.04131	2.23836				12.545	19	0.861027
		MR-PRESSO														0.42311	0.15863	2.66728	0.0152251	14.1258	0.86
IL-2 receptor α	Giant Cell Arteritis	MR Egger	3	1.69233	0.74943	0.265395	5.43215	1.25039	23.5993	-0.145221	0.108502	0.408503	0.257916	1	0.611556
		Weighted median	3	0.937887	0.464467	0.0434584	2.55458	1.02791	6.34864
		Inverse variance weighted	3	0.850295	0.412219	0.0391385	2.34034	1.04326	5.25008				2.04927	2	0.358927
MMP-1	Giant Cell Arteritis	MR Egger	4	-0.844596	1.43529	0.615832	0.429731	0.0257903	7.16039	0.112252	0.441767	0.823157	1.06711	2	0.586515
		Weighted median	4	-0.528754	0.213166	0.0131205	0.589339	0.388074	0.894985
		Inverse variance weighted	4	-0.482908	0.184191	0.00874733	0.616987	0.43002	0.885243				1.13168	3	0.769432
		MR-PRESSO														-0.482908	0.113128	-4.26869	0.0235945	1.77776	0.833
NT-proBNP	Giant Cell Arteritis	MR Egger	5	-0.558141	0.5158	0.358432	0.572272	0.208231	1.57275	0.0973796	0.206479	0.669378	0.159478	3	0.983849
		Weighted median	5	-0.338329	0.17954	0.0595084	0.712961	0.501462	1.01366
		Inverse variance weighted	5	-0.324978	0.147065	0.0271218	0.722544	0.541602	0.963936				0.381903	4	0.983932
		MR-PRESSO														-0.324977	0.0454417	-7.15152	0.00202286	0.624603	0.979
PECAM-1	Giant Cell Arteritis	MR Egger	4	2.81335	1.72158	0.243838	16.6657	0.570673	486.697	-0.213183	0.221476	0.437333	0.634222	2	0.72825
		Weighted median	4	1.34741	0.636712	0.0343273	3.84746	1.10457	13.4015
		Inverse variance weighted	4	1.23744	0.532333	0.0200952	3.44679	1.21418	9.78468				1.56074	3	0.668324
		MR-PRESSO														1.23744	0.383962	3.22283	0.0484796	3.02434	0.696
Tie-2	Giant Cell Arteritis	MR Egger	8	1.49167	0.907704	0.151417	4.44451	0.750189	26.3315	-0.146765	0.178387	0.442121	8.20461	6	0.223493
		Weighted median	8	0.671134	0.400134	0.0934886	1.95646	0.893037	4.28618
		Inverse variance weighted	8	0.795397	0.320547	0.0130876	2.21532	1.1819	4.15233				9.13022	7	0.243442
		MR-PRESSO														0.795397	0.320547	2.48138	0.0421251	11.7717	0.275
VEGFR-3	Giant Cell Arteritis	MR Egger	6	1.25239	0.765184	0.177031	3.49869	0.78085	15.6763	-0.413141	0.183621	0.087649	0.379566	4	0.984115
		Weighted median	6	-0.263985	0.218998	0.228042	0.767985	0.499963	1.17969
		Inverse variance weighted	6	-0.425798	0.178207	0.0168787	0.653248	0.460665	0.926342				5.44189	5	0.36436
		MR-PRESSO														-0.425798	0.178207	-2.38934	0.0624387	7.59438	0.442
angiogenin	Giant Cell Arteritis	Inverse variance weighted	2	-2.34293	0.771603	0.00239382	0.0960456	0.0211678	0.435792				0.00172852	1	0.966837
SP-D	Giant Cell Arteritis	MR Egger	3	0.619566	1.58813	0.763201	1.85812	0.0826473	41.7753	0.062095	0.431295	0.908969	3.95937	1	0.0466112
		Weighted median	3	0.984641	0.388219	0.0112031	2.67685	1.25073	5.72905
		Inverse variance weighted	3	0.835717	0.369958	0.0238863	2.30647	1.11695	4.7628				4.04144	2	0.13256
cFib	Retinopathy	Wald ratio	1	-0.745544	0.362275	0.0395946	0.474476	0.23326	0.965136
ST2	Retinopathy	MR Egger	3	0.876195	1.04572	0.556008	2.40174	0.30931	18.6492	-0.0717509	0.185267	0.764772	0.909776	1	0.340174
		Weighted median	3	0.392093	0.255323	0.124619	1.48008	0.897322	2.44129
		Inverse variance weighted	3	0.48012	0.218182	0.0277681	1.61627	1.05388	2.47876				1.05976	2	0.588674
IL-2 receptor α	Retinopathy	Inverse variance weighted	2	-1.0818	0.473501	0.0223312	0.338984	0.134007	0.857495				0.00560009	1	0.940347
Lp(a)	Retinopathy	MR Egger	3	-0.435626	0.431537	0.496998	0.64686	0.277638	1.5071	0.162483	0.25927	0.64361	0.505016	1	0.477304
		Weighted median	3	-0.150129	0.102264	0.142089	0.860597	0.704289	1.0516
		Inverse variance weighted	3	-0.169655	0.0781422	0.029923	0.843956	0.724109	0.983639				0.897762	2	0.638342
angiogenin	Keratitis	MR Egger	3	0.651451	2.06975	0.805874	1.91832	0.0331982	110.848	-0.124491	0.30596	0.753991	0.0100529	1	0.920135
		Weighted median	3	-0.18514	0.09149	0.0430099	0.830988	0.694571	0.994197
		Inverse variance weighted	3	-0.190115	0.0774216	0.014066	0.826864	0.710447	0.962359				0.17561	2	0.915939
CFH	Keratitis	Wald ratio	1	-0.328906	0.166064	0.0476367	0.719711	0.519758	0.996586
MIP-1β	Keratitis	MR Egger	3	-0.0889807	0.264371	0.793312	0.914863	0.544902	1.53601	0.0653758	0.0879533	0.593073	0.361451	1	0.547702
		Weighted median	3	0.102287	0.046288	0.0271196	1.1077	1.01163	1.2129
		Inverse variance weighted	3	0.105871	0.034248	0.00199278	1.11168	1.03951	1.18886				0.913947	2	0.633197
SHBG	Keratitis	MR Egger	7	-0.0372882	0.359663	0.921457	0.963398	0.476052	1.94965	-0.00549756	0.0593257	0.929766	5.47837	5	0.360324
		Weighted median	7	-0.0733144	0.0448896	0.102423	0.929309	0.851038	1.01478
		Inverse variance weighted	7	-0.0704572	0.0336282	0.0361549	0.931968	0.872521	0.995464				5.48778	6	0.482935
		MR-PRESSO														-0.0704572	0.0321608	-2.19078	0.0709983	7.48089	0.504
TARC	Keratitis	Inverse variance weighted	2	0.0934861	0.0430524	0.0298973	1.098	1.00914	1.19467				0.20508	1	0.650651
CFHR1	Keratitis	MR Egger	5	-0.339363	0.323299	0.370962	0.712224	0.377936	1.34219	0.0221422	0.0387577	0.607793	2.56819	3	0.463094
		Weighted median	5	-0.192181	0.0907851	0.03427	0.825157	0.690652	0.985859
		Inverse variance weighted	5	-0.158503	0.0655828	0.0156556	0.85342	0.750477	0.970483				2.89457	4	0.575621
		MR-PRESSO														-0.158503	0.0557894	-2.8411	0.0468153	4.50369	0.633
eotaxin-2	Encephalitis	MR Egger	4	-0.298615	1.30328	0.840069	0.741845	0.0576683	9.54309	0.231748	0.344879	0.570831	0.0179176	2	0.991081
		Weighted median	4	0.613477	0.299742	0.0406893	1.84684	1.02632	3.32335
		Inverse variance weighted	4	0.561402	0.246022	0.0224942	1.75313	1.08242	2.83944				0.469457	3	0.925548
		MR-PRESSO														0.561402	0.0973221	5.7685	0.0103558	0.829658	0.943
TECK	Encephalitis	MR Egger	7	0.103011	0.665417	0.883029	1.1085	0.300831	4.08461	-0.168658	0.205087	0.448291	3.1706	5	0.673703
		Weighted median	7	-0.387002	0.248145	0.118859	0.67909	0.417543	1.10447
		Inverse variance weighted	7	-0.420171	0.19506	0.0312353	0.656934	0.448212	0.962854				3.8469	6	0.697386
		MR-PRESSO														-0.420171	0.156188	-2.69016	0.0360449	4.53689	0.798
YKL-40	Encephalitis	MR Egger	4	1.48045	1.27186	0.364501	4.39494	0.363349	53.1596	-0.124002	0.207074	0.61008	0.136256	2	0.934141
		Weighted median	4	0.773327	0.452673	0.0875701	2.16696	0.892337	5.26229
		Inverse variance weighted	4	0.754043	0.382269	0.0485472	2.12558	1.00481	4.49646				0.494851	3	0.920021
		MR-PRESSO														0.754043	0.155255	4.85681	0.0166653	0.746701	0.941
ErbB3	Cranial Nerve Palsy	MR Egger	6	0.273089	0.228474	0.297998	1.31402	0.839693	2.05628	-0.0368046	0.0585239	0.563552	5.35087	4	0.253152
		Weighted median	6	0.147325	0.0871704	0.0910121	1.15873	0.976746	1.37462
		Inverse variance weighted	6	0.13697	0.0685887	0.0458279	1.14679	1.00254	1.3118				5.87993	5	0.318078
		MR-PRESSO														0.13697	0.0685887	1.99697	0.102334	8.27387	0.401
IGFBP-2	Cranial Nerve Palsy	MR Egger	6	-0.474601	0.337734	0.232652	0.622133	0.320921	1.20606	0.0510359	0.0652241	0.477667	3.2408	4	0.518367
		Weighted median	6	-0.196464	0.112106	0.0796899	0.821631	0.659554	1.02354
		Inverse variance weighted	6	-0.218827	0.084938	0.00998588	0.803461	0.680243	0.948998				3.85306	5	0.57076
		MR-PRESSO														-0.218827	0.0745624	-2.93482	0.0324508	5.47676	0.604
IL-6R	Cranial Nerve Palsy	MR Egger	4	-0.0884019	0.439203	0.859095	0.915393	0.387035	2.16503	0.0652812	0.101569	0.586247	0.270472	2	0.87351
		Weighted median	4	0.177111	0.102985	0.085473	1.19376	0.975564	1.46077
		Inverse variance weighted	4	0.187446	0.093284	0.044493	1.20617	1.00462	1.44814				0.683573	3	0.877061
		MR-PRESSO														0.187446	0.0445286	4.20957	0.024484	2.18837	0.791
cathepsin D	Gastrointestinal Infections	MR Egger	4	-0.298291	0.328173	0.459324	0.742086	0.390039	1.41189	0.0372165	0.0286287	0.323255	1.38156	2	0.501185
		Weighted median	4	0.109077	0.0685144	0.111378	1.11525	0.975104	1.27553
		Inverse variance weighted	4	0.12248	0.0547794	0.0253604	1.1303	1.01523	1.25841				3.07149	3	0.380734
		MR-PRESSO														0.12248	0.0547795	2.23587	0.111388	5.68945	0.448
haptoglobin	Gastrointestinal Infections	MR Egger	5	-0.0594904	0.0503084	0.322186	0.942245	0.853769	1.03989	0.000281199	0.00915624	0.977429	2.26703	3	0.518866
		Weighted median	5	-0.0474748	0.0321735	0.140054	0.953634	0.895355	1.01571
		Inverse variance weighted	5	-0.0581427	0.0246019	0.0181108	0.943515	0.899099	0.990126				2.26798	4	0.686605
		MR-PRESSO														-0.0581427	0.018525	-3.13861	0.0348943	5.25535	0.636
Apo E	Gastrointestinal Infections	Inverse variance weighted	2	0.0908984	0.0455299	0.0458841	1.09516	1.00166	1.19738				0.475168	1	0.490619
